# Supplementary material for: Feasibility of SARS-CoV-2 Surveillance Testing Among Children and Childcare Workers at German Day Care Centers: A Nonrandomized Controlled Trial
Source: PubMed Central journal article supplement (PMC8728621; doi:10.1001/jamanetworkopen.2021.42057), 2022-01-04
Supplement: jamanetwopen-e2142057-s002.pdf [file jamanetwopen-e2142057-s002.pdf]

## Supplemental Online Content

Forster J, Streng A, Rudolph P, et al; Wü-KiTā-CoV-Study Group. Feasibility of SARS-CoV-2 surveillance testing among children and childcare workers at German day care centers: a nonrandomized controlled trial. *JAMA Netw Open*. 2022;5(1):e2142057. doi:10.1001/jamanetworkopen.2021.42057

**eAppendix 1.** Supplemental Methods

**eAppendix 2.** Supplemental Results

**eTable 1.** Characteristics and Attitudes of Participating Parents

**eTable 2.** Characteristics and Attitudes of Participating CCW

**eTable 3.** Factors Associated With and Reasons for Declined Participation in Parents

**eTable 4.** Dropout Rates in Modules 1-3 and Unsuccessful Testing in Module 4

**eTable 5.** Number of Samples Tested for SARS-CoV-2 in DCC With Continuous Surveillance (Modules 1-3)

**eTable 6.** Model Parameters Used for All Simulations

**eTable 7.** Varied Parameters and Processes in the Model

**eFigure 1.** Flowcharts of Wue-KiTā-CoV Study

**eFigure 2.** General and Specific Measures Implemented Against SARS-CoV-2

**eFigure 3.** Final Assessment of Study Measures by Parents and CCWs

**eFigure 4.** Events Associated With Potential Introduction of SARS-CoV-2 Into a DCC

**eFigure 5.** Modeling Results Scenario 1

**eFigure 6.** Simulation Results of the Virtual Infection Spread Model for Scenario 2

**eFigure 7.** Modeling Results Scenario 3

**eFigure 8.** Modeling: Effects of Longer Time to Result on Scenario 1

**eFigure 9.** Modeling: Effects of Longer Time to Result on Scenario 2

**eFigure 10.** Modeling: Effects of Longer Time to Result on Scenario 3

**eReferences**

This supplemental material has been provided by the authors to give readers additional information about their work.

# eAppendix 1. Supplemental Methods

## **SARS-CoV-2 PCR and antibody testing**

SARS-CoV-2 nucleic acid testing was performed using CE certified tests. For the detection of SARS-CoV-2 IgG antibodies, participants were screened by point-of-care testing (Panbio COVID-19 IgG/IgM Rapid Test, Abbott, North Chicago, USA) after fingertip prick. Positive results were verified from serum samples using SERION ELISA agile SARS-CoV-2 (Institut Virion/Serion, Wuerzburg, Germany, target: SARS-CoV-2 spike protein) and Elecsys Anti-SARS-CoV-2 (Hoffmann-La Roche AG, Basel, Switzerland, target: SARS-CoV-2 nucleocapsid) <sup>2</sup>. Only IgG positive samples verified by ELISAs were considered positive.

## **Questionnaires and interviews**

### *Questionnaires*

To identify children with chronic or special health care needs we used the Children with Special Health Care Needs-(CSHCN-) Screener. <sup>3</sup> The CSHCN Screener is a set of five questions to be self-administered as part of a parent/caretaker survey. The definition of a special care need (CSHCN positive screening) was based on the affirmative answer to at least one of the five main questions, including all associated sub-questions.

Key aspects of general health were measured in parents and CCW by self-report with the Minimum European Health Module (MEHM, <sup>4</sup>. The MEHM consists of three global questions concerning three health domains: self-perceived health, chronic conditions and long-term activity limitation.

In addition, internal symptoms (anxiety, depression) were assessed in parents, CCW and children. For children, the subscale "anxious/depressed" of the German version of the Child Behaviour Checklist 1.5-5 <sup>5</sup> was administered via parent-report. Symptomatology in parents and CCW was measured via self-report by the Patient Health Questionnaire-4 (PHQ-4, <sup>6</sup>. Its

four items are drawn from the first two items of the 'Generalized Anxiety Disorder–7 scale' (GAD–7) and the 'Patient Health Questionnaire-8' (PHQ-8).

For descriptive purposes, for both scales we set the cut-off at the 90th percentile using the original US-American norms of the CBCL 1.5-5 for both sexes and German sex-specific norms for 25 to 34 year olds of the PHQ-4.<sup>7</sup>

### *Qualitative Interviews*

Semi-structured interviews were held with a subsample of parents of the children and teachers from the day care center (DCC) to explore the expectations, demands and concerns regarding the four tested modules. These data will be analysed separately.

### **Data analysis for the feasibility study**

All variables were presented as frequencies.

The sample size was given by the number of children and CCW. Before the start of study, we assumed in module 1 a minimum sample size of 100 children and 5 CCW, which is sufficient to reach an acceptance of 30% with a precision of 9.1%, and in module 2 a minimum sample size of 100 children and 5 CCW, which is sufficient to reach an acceptance of 37.5% with a precision of 8.7%, and in module 3 a minimum sample size of 175 children and 10 CCWs, which is sufficient to reach an acceptance of 37.5% with a precision of 6.9%.

In module 4, the potential number of tests was dependent on the number of children and CCW in the participating module and the household size per participating family in the module plus the proportion with acute respiratory illness (ARI). We assumed an average family size of 3.5 persons, a proportion of 0.025 ARI per week and a sample size of 275 (250 children, 25 caregivers).<sup>1,8</sup>

Based on this data, the following expected number of recommended tests is derived:

Number of recommended tests = household size \* (children + CCW) \* proportion with ARI per week \* observation period in weeks =  $3.5 * 275 * 0.025 * 12 = 279$

We assume that 70% of all sample collections planned will be successful. A number of 279 recommended tests will be sufficient to estimate a 70% proportion of successful sample collections with a precision (half the width of the 95%-CI using the Wilson score method) of 5.4%.

The primary endpoints per module were estimated as 95%-confidence intervals using the Wilson score method. The significance level was set to 5% for all analysis. No adjustment for multiple testing was done, as all analysis were explorative. Descriptive statistics (frequencies (percent), median (IQR)) of baseline and follow-up data are displayed stratified by children/parents and CCW. Analysis were conducted separately for children/parents and CCW. According to the distribution of the variables, differences between two groups (participations vs. no participations, drop-out vs. no drop-outs) were tested using the  $\chi^2$  -test, Fisher Test, Student's t-test or Mann-Whitney U-Test.

To determine the influence of the type of respiratory surveillance in participating in the surveillance, the attitude of the parents towards SARS-CoV-2 variables and sociodemographic factors such as age, sex and school education of their children univariable and multivariable logistic regression analysis was performed for parents. The question "What are your views on the planned measures for SARS-CoV-2 testing at your day care center?" was excluded from the logistic regression, due to collinearity with other variables. Due to the large sample size, no variable selection was performed. For CCW the sample size was too small to perform a logistic regression for the participation rate. Development in psychosocial factors and attitudes towards SARS-CoV-2 over time were analysed using McNemar-Bowker Test, Cochran Test or Friedmann Test as appropriately. Changes over time were calculated combined and stratified by study module (1-3 vs 4). Due to the small number of drop-outs no multivariable analysis for drop-outs was conducted. All analyses were performed in SAS Version 9.4 or SPSS Version 26.

In case more than one child of family participated in the study, the parent related questions were counted only once. If the questionnaire was filled out twice, randomly one was chosen.

## Mathematical Model

To model the spread of infection in DCC, we considered a typical DCC consisting of  $N$  children groups  $C = (C_1, \dots, C_N)$  and their corresponding CCW  $T = (T_1, \dots, T_N)$  as well as the head of the DCC  $H$ . Furthermore, children groups consist of subgroups of children participating or not participating in regular testing, respectively. All individuals within the same group can interact with each other and, thus, can infect each other. Furthermore, infection transmission is also possible between individuals from different groups: Firstly, children and CCW from different groups can infect each other via the common usage of e.g. bathrooms. Secondly, children and the corresponding CCW can infect each other as they stay in the same room. Thirdly, also CCW from different groups and CCW and the head of the DCC can infect each other, as we assume daily meetings of CCW among each other as well as with the head for a certain duration each day in respective rooms. The group structure of this virtual DCC is depicted in the main manuscript (Figure 3A). The applied parameters are shown in eTable 6. Since the number of individuals in DCC is generally low and, thus, stochastic variation is high, we used a state-based model (SBM) to account for the stochasticity in the system. The SBM as depicted in the main manuscript (Figure 3B) shows the model states and the state transitions defined by the corresponding transition rates. For each of the aforementioned groups, this SBM is realized with group specific rates and parameters as summarized above. Each individual in the virtual DCC belongs to one model state: All individuals that can be infected are in the state *Susceptible*. They can become infected with rates  $i_{si,inter}$  and  $i_{si,intra}$  that account for inter- and intra-group infection, respectively. In order to calculate infection risks, we simulate for each infectious individual a unique viral load kinetics based on the piecewise linear viral load model which is used in Jones *et al.*<sup>9</sup> for estimating viral peaks from patient data. Under consideration of the viral load at a certain time point as well as the room size, emission, respiratory rate and contact duration for different interactions, we calculate the infection probability using the aerosol transmission and infection risk calculator in indoor environments by Lelieveld *et al.*<sup>10</sup> Infected individuals are either in the state 'symptomatic infected' or 'asymptomatic infected' depending on a parameter that defines the ratio of symptomatic over asymptomatic individuals.

Furthermore, individuals can obtain the states *Quarantined* or *Isolated* and recovered individuals obtain the state *Immune* and are henceforth considered to be not susceptible to infection anymore. This is an assumption we can make since we only simulate the infections spread during the first 30 days after the introduction of an index case. Infected individuals that are tested positive will always be isolated. However, transition to the state *Quarantined* depends on the implemented policy. We simulated two different quarantine policies: Firstly, quarantine policies implemented during the duration of the study, *i.e.* all group members in the same children group and the corresponding CCW will be quarantined and are only allowed to go back to the DCC after they had one negative test result after seven days or stayed in quarantine for 14 days. In the following we will refer to this policy as “regular quarantine policy”. Secondly, only positive tested individuals are isolated and all other children and CCW will remain in the DCC to maintain child care to which we will refer in the following as “limited quarantine policy”.

Besides, we used this model to predict infection spread within the DCC for various scenarios, where we varied the test participation of the children from 0% to 100%, the test frequency (No testing, 1 weekly, 5 days/week) as well as the respective test days. All different scenarios we simulated are shown in eTable 7.

Each of these scenarios was simulated 40,000 times. Furthermore, we considered three different starting conditions for the entry of the infection into the DCC: (i) the worst-case scenario with an infected asymptomatic child that does not participate in regular testing, (ii) a random scenario with an infected child that is randomly symptomatic or asymptomatic and randomly takes part in regular testing and (iii) a random scenario with an infected CCW that is randomly symptomatic or asymptomatic.

In the SBM simulations, testing of individuals is performed by PCR-testing with test quality criteria as given in eTable 6. Simulations are performed for a time duration of 30 days with a time step of one day. Thus, infection spread is simulated on a daily basis and tests are always

performed in the morning, such that test results will be available in the evening of the same day, *i.e.* these processes are realized in a fixed order in the model implementation.

### **Data analysis for the mathematical model**

To evaluate infection spread in each simulated scenario, we calculated the average number of secondary infections (ASI) that occurred over all simulations in one scenario. Furthermore, to compare both quarantine policies we computed the probability that in the “limited quarantine scenario” more secondary infections occur than in the “regular quarantine scenario”. Under the null hypothesis that this quarantine policy does not affect the number of secondary infections, the distribution of the number of secondary infections is identical and, thus, both quarantine policies are equally good. To determine significance of the obtained probability, we computed the p-value by using a permutation testing framework, where the data from both quarantine policies are merged and 1000 new distributions are randomly drawn from the data. The p-value is then the probability that our original obtained probability is a realization of one probability obtained by the permutation testing framework. The significance is then indicated by comparing the p-value with four significance levels (\*\*\*\*  $p < 0.001$ , \*\*\* $p < 0.005$ , \*\* $p < 0.01$ , \* $p < 0.05$ ).

## eAppendix 2. Supplemental Results

### **Additional SARS-CoV-2 testing during lockdown and in symptomatic participants in module 1-3**

During the lockdown, asymptomatic testing was continued for children and CCW of module 1-3 present in DCC and 158/165 mid-turbinate swabs and 594/311 saliva samples from children/CCW were tested. SARS-CoV-2 was detected in one saliva sample of a four-year-old child (eTable 5).

Additionally to asymptomatic testing, 9 oropharyngeal swabs of 8 symptomatic participants of module 1-3 (two children, one CCW, five household members) were tested during the 12-weeks study period and 18 oropharyngeal swabs of 18 participants (four children, three CCW, 11 household members) during the lockdown. No additional SARS-CoV-2 infection was detected.

In module 4, 86 oropharyngeal swabs of 75 symptomatic participants (23 children, 13 CCW and 39 household members) were tested during the lockdown and one SARS-CoV-2 infection was detected.

Incidents that could potentially result in an introduction and outbreak of SARS-CoV-2 inside a participating DCC, were recorded as events (eFig. 4). In addition to all infections detected by study procedures, cases identified by contact tracing of participants or related to children or CCW of the participating DCCs are illustrated. Six events occurred in the 12-week study period, and six additional events during lockdown. One event (E6) was detected by continuous testing and did not result in intra-DCC transmission. Three events (E1, E4, E7) were identified by symptomatic testing and seven events (E2, E3, E5, E8, E9, E10, E11) by contact tracing. In one event (E12), the index case was a child not participating in the study and no information on the indication to test was available. Two of the events, both in module 4, resulted in outbreaks in the DCC: In E1, after introduction of SARS-CoV-2 11 secondary cases (seven children, four CCW) were detected by contact tracing inside the DCC. The affected DCC was



closed by public health authorities for 14 days. In E10, SARS-CoV-2 was detected in a symptomatic CCW not participating in the study. Among 20 children and seven CCW in the group, SARS-CoV-2 was transmitted to one child and its father.

**eTable 1. Characteristics and Attitudes of Participating Parents****eTable 1a:** Sociodemographic characteristics of children and parents from daycare centers screened for their willingness to participate in respiratory surveillance for SARS-CoV-2 (WueKiTaCoV Study, Germany, 2020-2021)

|                                                     | N          | All        | N                | Parents agreed to respiratory surveillance | N          | Parents did not agree to respiratory surveillance | p-value* |
|-----------------------------------------------------|------------|------------|------------------|--------------------------------------------|------------|---------------------------------------------------|----------|
| <b>Children</b>                                     | <b>635</b> |            | <b>440</b>       |                                            | <b>195</b> |                                                   |          |
| Age, median (IQR)                                   | 581        | 3 (2-4)    | 442 <sup>1</sup> | 3 (2-4)                                    | 139        | 3 (2-4)                                           | 0.4733   |
| Female, n (%)                                       | 578        | 282 (48.8) | 440              | 214 (48.6)                                 | 138        | 68 (49.3)                                         | 0.8958   |
| Comorbidities (any), n (%)                          | 564        | 51 (9)     | 431              | 35 (8.1)                                   | 133        | 16 (12)                                           | 0.1694   |
| Pulmonary, n (%)                                    | 51         | 14 (27.5)  | 35               | 11 (31.4)                                  | 16         | 3 (18.8)                                          | 0.3465   |
| Cardiovascular disease, n (%)                       | 51         | 8 (15.7)   | 35               | 5 (14.3)                                   | 16         | 3 (18.8)                                          | 0.6842   |
| Nervous system, n (%)                               | 51         | 1 (2)      | 35               |                                            | 16         | 1 (6.3)                                           | NA       |
| Allergies, n (%)                                    | 51         | 20 (39.2)  | 35               | 15 (42.9)                                  | 16         | 5 (31.3)                                          | 0.4308   |
| Other, n (%)                                        | 51         | 13 (25.5)  | 35               | 8 (22.9)                                   | 16         | 5 (31.3)                                          | 0.5234   |
| German nationality, n (%)                           | 562        | 538 (95.7) | 429              | 412 (96.0)                                 | 133        | 126 (94.7)                                        | 0.5169   |
| <b>Parents<sup>2</sup></b>                          | <b>570</b> |            | <b>379</b>       |                                            | <b>191</b> |                                                   |          |
| Age, median (IQR)                                   | 503        | 36 (33-40) | 376              | 37 (33-40)                                 | 127        | 35 (31-39)                                        | 0.0058   |
| Female, n (%)                                       | 507        | 382 (75.3) | 377              | 276 (73.2)                                 | 130        | 106 (81.5)                                        | 0.0574   |
| German nationality, n (%)                           | 503        | 447 (88.9) | 376              | 339 (90.2)                                 | 127        | 108 (85)                                          | 0.1127   |
| School education, n (%)                             | 503        |            | 373              |                                            | 130        |                                                   | <0.0001  |
| None                                                |            | 1 (0.2)    |                  | 1 (0.3)                                    |            |                                                   |          |
| Secondary Comprehensive                             |            | 29 (5.8)   |                  | 10 (2.7)                                   |            | 19 (14.6)                                         |          |
| Secondary                                           |            | 89 (17.7)  |                  | 54 (14.5)                                  |            | 35 (26.9)                                         |          |
| Grammar                                             |            | 377 (74.9) |                  | 303 (81.2)                                 |            | 74 (57.0)                                         |          |
| Other                                               |            | 7 (1.4)    |                  | 5 (1.3)                                    |            | 2 (1.5)                                           |          |
| Working status, n (%)                               | 501        |            | 371              |                                            | 130        |                                                   | 0.2296   |
| Employed / full-time                                |            | 145 (28.9) |                  | 111 (29.9)                                 |            | 34 (26.2)                                         |          |
| Employed / part-time                                |            | 254 (50.7) |                  | 191 (51.5)                                 |            | 63 (48.5)                                         |          |
| Self-employed                                       |            | 27 (5.4)   |                  | 15 (4)                                     |            | 12 (9.2)                                          |          |
| Unemployed                                          |            | 68 (13.6)  |                  | 50 (13.2)                                  |            | 19 (14.6)                                         |          |
| Other                                               |            | 7 (1.4)    |                  | 5 (1.3)                                    |            | 2 (1.5)                                           |          |
| All adults of the household are employed, n (%)     | 480        | 386 (80.4) | 358              | 286 (79.9)                                 | 122        | 100 (82)                                          | 0.6173   |
| Importance of childcare access in daily life, n (%) | 505        |            | 373              |                                            | 132        |                                                   | 0.0493   |
| Not important at all                                |            | 6 (1.2)    |                  | 2 (0.5)                                    |            | 4 (3)                                             |          |
| Slightly important                                  |            | 12 (2.4)   |                  | 8 (2.1)                                    |            | 4 (3)                                             |          |
| Important                                           |            | 41 (8.1)   |                  | 28 (7.5)                                   |            | 13 (9.8)                                          |          |
| Fairly important                                    |            | 104 (20.6) |                  | 85 (22.8)                                  |            | 19 (14.4)                                         |          |
| Very important                                      |            | 342 (67.7) |                  | 250 (67)                                   |            | 92 (69.7)                                         |          |
| Number of persons per household, median (IQR)       |            |            |                  |                                            |            |                                                   |          |
| All                                                 | 504        | 4 (3-4)    | 372              | 4 (3-4)                                    | 132        | 4 (3-4)                                           | 0.4165   |
| Adults                                              | 503        | 2 (2-2)    | 371              | 2 (2-2)                                    | 132        | 2 (2-2)                                           | 0.4758   |
| Children                                            | 506        | 2 (1-2)    | 373              | 2 (1-2)                                    | 133        | 2 (1-2)                                           | 0.2960   |
| Size of home, n (%)                                 | 506        |            | 375              |                                            | 131        |                                                   | 0.0883   |
| < 60 m <sup>2</sup>                                 |            | 9 (1.8)    |                  | 4 (1.1)                                    |            | 5 (3.8)                                           |          |
| 60-80 m <sup>2</sup>                                |            | 93 (18.4)  |                  | 62 (16.5)                                  |            | 31 (23.7)                                         |          |
| 81-100 m <sup>2</sup>                               |            | 134 (26.5) |                  | 102 (27.2)                                 |            | 32 (24.4)                                         |          |
| 101-120 m <sup>2</sup>                              |            | 103 (20.4) |                  | 78 (20.8)                                  |            | 25 (19.1)                                         |          |
| >120 m <sup>2</sup>                                 |            | 167 (33.0) |                  | 129 (34.4)                                 |            | 38 (29)                                           |          |
| Home features                                       | 508        |            | 376              |                                            | 132        |                                                   | 0.9001   |
| No garden or balcony                                |            | 26 (5.1)   |                  | 19 (5.1)                                   |            | 7 (5.3)                                           |          |
| Balcony / terrace                                   |            | 218 (42.9) |                  | 163 (43.4)                                 |            | 55 (41.7)                                         |          |
| Garden                                              |            | 82 (16.1)  |                  | 58 (15.4)                                  |            | 24 (18.2)                                         |          |
| Garden plus balcony / terrace                       |            | 182 (35.8) |                  | 136 (36.2)                                 |            | 46 (34.8)                                         |          |

<sup>1</sup> Age was available from two additional children without detailed screening questionnaire <sup>2</sup> Questionnaire for one parent per household \*Chi-square test

**eTable 1b.** Attitudes of parents from daycare centers screened for their willingness to participate in respiratory surveillance for SARS-CoV-2 (WueKiTaCoV Study, Germany, 2020-2021)

|                                                                                                                            | N   | All        | N   | Parents agreed to respiratory surveillance | N   | Parents did not agree to respiratory surveillance | p-value* |
|----------------------------------------------------------------------------------------------------------------------------|-----|------------|-----|--------------------------------------------|-----|---------------------------------------------------|----------|
| How dangerous do you think SARS-COV-2 is for you/your family? n (%)                                                        | 506 |            | 373 |                                            | 133 |                                                   | 0.0002   |
| Not dangerous                                                                                                              |     | 21 (4.1)   |     | 7 (1.9)                                    |     | 14 (10.5)                                         |          |
| Somewhat dangerous                                                                                                         |     | 97 (19.1)  |     | 80 (21.4)                                  |     | 17 (12.8)                                         |          |
| Dangerous                                                                                                                  |     | 222 (43.9) |     | 167 (44.8)                                 |     | 55 (41.4)                                         |          |
| Fairly dangerous                                                                                                           |     | 121 (23.9) |     | 88 (23.6)                                  |     | 33 (24.8)                                         |          |
| Very dangerous                                                                                                             |     | 45 (8.9)   |     | 31 (8.2)                                   |     | 14 (10.5)                                         |          |
| How dangerous do you think SARS-COV-2 is for the society? n (%)                                                            | 507 |            | 374 |                                            | 133 |                                                   | <0.0001  |
| Not dangerous                                                                                                              |     | 10 (2)     |     | 1 (0.3)                                    |     | 9 (6.8)                                           |          |
| Somewhat dangerous                                                                                                         |     | 13 (2.6)   |     | 6 (1.6)                                    |     | 7 (5.3)                                           |          |
| Dangerous                                                                                                                  |     | 118 (23.3) |     | 83 (22.2)                                  |     | 35 (26.3)                                         |          |
| Fairly dangerous                                                                                                           |     | 230 (45.4) |     | 181 (48.4)                                 |     | 49 (36.8)                                         |          |
| Very dangerous                                                                                                             |     | 136 (26.8) |     | 103 (27.5)                                 |     | 33 (24.8)                                         |          |
| I personally know someone (family / friends / acquaintances) who tested positive / was ill / died due to SARS-COV-2; n (%) | 509 | 197 (38.7) | 377 | 156 (41.4)                                 | 132 | 41 (31.1)                                         | 0.0371   |
| How important do you think restrictive measures to control SARS-CoV-2 are? n (%)                                           | 506 |            | 375 |                                            | 131 |                                                   | <0.0001  |
| Not important at all                                                                                                       |     | 10 (2)     |     | 3 (0.8)                                    |     | 7 (5.3)                                           |          |
| Slightly important                                                                                                         |     | 13 (2.6)   |     | 7 (1.9)                                    |     | 6 (4.6)                                           |          |
| Important                                                                                                                  |     | 59 (11.7)  |     | 34 (9.1)                                   |     | 25 (19.1)                                         |          |
| Fairly important                                                                                                           |     | 154 (30.4) |     | 112 (29.9)                                 |     | 42 (32.1)                                         |          |
| Very important                                                                                                             |     | 270 (53.4) |     | 219 (58.4)                                 |     | 51 (38.9)                                         |          |
| What are your views on the planned measures for SARS-CoV-2 testing at your daycare center? n (%)                           | 500 |            | 372 |                                            | 128 |                                                   | <0.0001  |
| Very critical                                                                                                              |     | 37 (7.4)   |     | 3 (0.8)                                    |     | 34 (26.6)                                         |          |
| Somewhat critical                                                                                                          |     | 32 (6.4)   |     | 8 (2.2)                                    |     | 24 (18.8)                                         |          |
| Neutral                                                                                                                    |     | 93 (18.6)  |     | 52 (14)                                    |     | 41 (32)                                           |          |
| Openminded                                                                                                                 |     | 132 (26.4) |     | 116 (31.2)                                 |     | 16 (12.5)                                         |          |
| Very openminded                                                                                                            |     | 206 (41.2) |     | 193 (51.9)                                 |     | 13 (10.2)                                         |          |
| How much do you currently feel limited in your personal life by SARS-CoV-2? n (%)                                          | 509 |            | 377 |                                            | 132 |                                                   | <0.0001  |
| Not limited at all                                                                                                         |     | 17 (3.3)   |     | 11 (2.9)                                   |     | 6 (4.5)                                           |          |
| Slightly limited                                                                                                           |     | 104 (20.4) |     | 86 (22.8)                                  |     | 18 (13.6)                                         |          |
| Limited                                                                                                                    |     | 203 (39.9) |     | 162 (43)                                   |     | 41 (31.1)                                         |          |
| Fairly limited                                                                                                             |     | 142 (27.9) |     | 98 (26)                                    |     | 44 (33.3)                                         |          |
| Very limited                                                                                                               |     | 43 (8.4)   |     | 20 (5.3)                                   |     | 23 (17.4)                                         |          |
| Assuming a vaccine is discovered, would you be willing to be vaccinated against SARS-CoV-2? n (%)                          | 509 |            | 376 |                                            | 133 |                                                   | <0.0001  |
| Yes                                                                                                                        |     | 256 (50.3) |     | 220 (58.5)                                 |     | 36 (27.1)                                         |          |
| No                                                                                                                         |     | 60 (11.8)  |     | 23 (6.1)                                   |     | 37 (27.8)                                         |          |
| Don't know                                                                                                                 |     | 193 (37.9) |     | 133 (35.4)                                 |     | 60 (45.1)                                         |          |
| How important do you consider vaccinations in general? n (%)                                                               | 510 |            | 377 |                                            | 133 |                                                   | <0.0001  |
| Not important at all                                                                                                       |     | 12 (2.4)   |     | 2 (0.5)                                    |     | 10 (7.5)                                          |          |
| Slightly important                                                                                                         |     | 6 (1.2)    |     | 2 (0.5)                                    |     | 4 (3)                                             |          |
| Important                                                                                                                  |     | 37 (7.3)   |     | 14 (3.7)                                   |     | 23 (17.3)                                         |          |
| Fairly important                                                                                                           |     | 83 (16.3)  |     | 58 (15.4)                                  |     | 25 (18.8)                                         |          |
| Very important                                                                                                             |     | 372 (72.9) |     | 301 (79.8)                                 |     | 71 (53.4)                                         |          |

\*Chi-square test

## eTable 2. Characteristics and Attitudes of Participating CCW

**eTable 2a.** Socio-demographic characteristics of CCW from daycare centers screened for their willingness to participate in respiratory surveillance for SARS-CoV-2 (WueKiTaCoV Study, Germany, 2020-2021)

|                                                     | N          | All        | N          | CCW agreed to respiratory surveillance | N        | CCW did not agree to respiratory surveillance |
|-----------------------------------------------------|------------|------------|------------|----------------------------------------|----------|-----------------------------------------------|
| <b>CCW</b>                                          | <b>157</b> |            | <b>150</b> |                                        | <b>7</b> |                                               |
| Age, median (IQR)                                   | 147        | 29 (25-44) | 142        | 29 (25-44)                             | 5        | 34 (21-45)                                    |
| Female, n (%)                                       | 147        | 134 (91.2) | 142        | 129 (90.8)                             | 5        | 5 (100)                                       |
| German nationality, n (%)                           | 132        | 131 (99.2) | 128        | 127 (99.2)                             | 4        | 4 (100)                                       |
| School education, n (%)                             | 134        |            | 130        |                                        | 4        |                                               |
| Secondary Comprehensive                             |            | 14 (10.4)  |            | 13 (10)                                |          | 1 (25)                                        |
| Secondary                                           |            | 51 (38.1)  |            | 49 (37.7)                              |          | 2 (50)                                        |
| Grammar                                             |            | 68 (50.1)  |            | 67 (51.5)                              |          | 1 (25)                                        |
| Other                                               |            | 1 (0.7)    |            | 1 (0.8)                                |          | 0 (-)                                         |
| Working status, n (%)                               | 139        |            | 134        |                                        | 5        |                                               |
| Employed / full-time                                |            | 93 (66.9)  |            | 89 (66.4)                              |          | 4 (80)                                        |
| Employed / part-time                                |            | 43 (30.9)  |            | 43 (32.1)                              |          | 0 (-)                                         |
| Self-employed                                       |            | 1 (0.7)    |            | 0 (-)                                  |          | 1 (20)                                        |
| Unemployed                                          |            | 1 (0.7)    |            | 1 (0.7)                                |          | 0 (-)                                         |
| Other                                               |            | 1 (0.7)    |            | 1 (0.7)                                |          | 0 (-)                                         |
| Importance of childcare access in daily life, n (%) | 56         |            | 53         |                                        | 3        |                                               |
| Not important at all                                |            | 27 (48.2)  |            | 25 (47.2)                              |          | 2 (66.7)                                      |
| Slightly important                                  |            | 0 (-)      |            | 0 (-)                                  |          | 0 (-)                                         |
| Important                                           |            | 8 (14.3)   |            | 7 (13.2)                               |          | 1 (33.3)                                      |
| Fairly important                                    |            | 2 (3.6)    |            | 2 (3.8)                                |          | 0 (-)                                         |
| Very important                                      |            | 19 (33.9)  |            | 19 (35.8)                              |          | 0 (-)                                         |
| Number of persons per household, median (IQR)       |            |            |            |                                        |          |                                               |
| All                                                 | 148        | 2 (2-4)    | 142        | 2 (2-3)                                | 6        | 2.5 (2-5)                                     |
| Adults                                              | 145        | 2 (2-2)    | 140        | 2 (2-2)                                | 5        | 2 (1-2)                                       |
| Children                                            | 145        | 0 (0-1)    | 140        | 0 (0-1)                                | 5        | 1 (1-2)                                       |
| Size of home, n (%)                                 | 148        |            | 143        |                                        | 5        |                                               |
| < 60 m <sup>2</sup>                                 |            | 18 (12.2)  |            | 17 (11.9)                              |          | 1 (20)                                        |
| 60-80 m <sup>2</sup>                                |            | 34 (23.0)  |            | 33 (23.1)                              |          | 1 (20)                                        |
| 81-100 m <sup>2</sup>                               |            | 37 (25.0)  |            | 35 (24.5)                              |          | 2 (40)                                        |
| 101-120 m <sup>2</sup>                              |            | 19 (12.8)  |            | 19 (13.3)                              |          | 0 (-)                                         |
| >120 m <sup>2</sup>                                 |            | 40 (27.0)  |            | 39 (27.3)                              |          | 1 (20)                                        |
| Home features                                       | 149        |            | 143        |                                        | 6        |                                               |
| No garden or balcony                                |            | 23 (15.4)  |            | 23 (16.1)                              |          | 0 (-)                                         |
| Balcony / terrace                                   |            | 50 (33.6)  |            | 46 (32.2)                              |          | 4 (66.7)                                      |
| Garden                                              |            | 20 (13.4)  |            | 19 (13.3)                              |          | 1 (16.7)                                      |
| Garden plus balcony / terrace                       |            | 56 (37.6)  |            | 55 (38.5)                              |          | 1 (16.7)                                      |

**eTable 2b.** Attitudes of CCW from daycare centers screened for their willingness to participate in respiratory surveillance for SARS-CoV-2 (WueKiTaCoV Study, Germany, 2020-2021)

|                                                                                                                            | N   | All       | N   | CCW agreed to respiratory surveillance | N | CCW did not agree to respiratory surveillance |
|----------------------------------------------------------------------------------------------------------------------------|-----|-----------|-----|----------------------------------------|---|-----------------------------------------------|
| How dangerous do you think SARS-COV-2 is for you/your family? n (%)                                                        | 147 |           | 141 |                                        | 6 |                                               |
| Not dangerous                                                                                                              |     | 7 (4.8)   |     | 6 (4.3)                                |   | 1 (16.7)                                      |
| Somewhat dangerous                                                                                                         |     | 16 (10.9) |     | 14 (9.9)                               |   | 2 (33.3)                                      |
| Dangerous                                                                                                                  |     | 64 (43.5) |     | 62 (44.0)                              |   | 2 (33.3)                                      |
| Fairly dangerous                                                                                                           |     | 44 (29.9) |     | 43 (30.5)                              |   | 1 (16.7)                                      |
| Very dangerous                                                                                                             |     | 16 (10.9) |     | 16 (11.3)                              |   | 0 (-)                                         |
| How dangerous do you think SARS-COV-2 is for the society? n (%)                                                            | 149 |           | 143 |                                        | 6 |                                               |
| Not dangerous                                                                                                              |     | 3 (2)     |     | 2 (1.4)                                |   | 1 (16.7)                                      |
| Somewhat dangerous                                                                                                         |     | 5 (4.3)   |     | 3 (2.1)                                |   | 2 (33.3)                                      |
| Dangerous                                                                                                                  |     | 51 (34.2) |     | 49 (34.3)                              |   | 2 (33.3)                                      |
| Fairly dangerous                                                                                                           |     | 60 (40.3) |     | 59 (41.3)                              |   | 1 (16.7)                                      |
| Very dangerous                                                                                                             |     | 30 (20.1) |     | 30 (21)                                |   | 0 (-)                                         |
| I personally know someone (family / friends / acquaintances) who tested positive / was ill / died due to SARS-COV-2; n (%) | 149 | 48 (32.2) | 143 | 46 (32.2)                              | 6 | 2 (33.3)                                      |
| How important do you think restrictive measures to control SARS-CoV-2 are? n (%)                                           | 148 |           | 142 |                                        | 6 |                                               |
| Not important at all                                                                                                       |     | 1 (0.7)   |     | 1 (0.7)                                |   | 0 (-)                                         |
| Slightly important                                                                                                         |     | 8 (5.4)   |     | 5 (3.5)                                |   | 3 (50)                                        |
| Important                                                                                                                  |     | 31 (20.9) |     | 31 (21.8)                              |   | 0 (-)                                         |
| Fairly important                                                                                                           |     | 40 (27)   |     | 37 (26.1)                              |   | 3 (50)                                        |
| Very important                                                                                                             |     | 68 (45.9) |     | 68 (47.9)                              |   | 0 (-)                                         |
| What are your views on the planned measures for SARS-CoV-2 testing at your daycare center? n (%)                           | 147 |           | 141 |                                        | 6 |                                               |
| Very critical                                                                                                              |     | 1 (0.7)   |     | 0 (-)                                  |   | 1 (16.7)                                      |
| Somewhat critical                                                                                                          |     | 8 (5.4)   |     | 5 (3.5)                                |   | 3 (50)                                        |
| Neutral                                                                                                                    |     | 18 (12.2) |     | 18 (12.8)                              |   | 0 (-)                                         |
| Openminded                                                                                                                 |     | 44 (29.9) |     | 43 (30.5)                              |   | 1 (16.7)                                      |
| Very openminded                                                                                                            |     | 76 (51.7) |     | 75 (53.2)                              |   | 1 (16.7)                                      |
| How much do you currently feel limited in your personal life by SARS-CoV-2? n (%)                                          | 149 |           | 143 |                                        | 6 |                                               |
| Not limited at all                                                                                                         |     | 1 (0.7)   |     | 1 (0.7)                                |   | 0 (-)                                         |
| Slightly limited                                                                                                           |     | 28 (18.8) |     | 27 (18.9)                              |   | 1 (16.7)                                      |
| Limited                                                                                                                    |     | 67 (45.0) |     | 66 (46.2)                              |   | 1 (16.7)                                      |
| Fairly limited                                                                                                             |     | 34 (22.8) |     | 32 (22.4)                              |   | 2 (33.3)                                      |
| Very limited                                                                                                               |     | 19 (12.8) |     | 17 (11.9)                              |   | 2 (33.3)                                      |
| Assuming a vaccine is discovered, would you be willing to be vaccinated against SARS-CoV-2? n (%)                          | 149 |           | 143 |                                        | 6 |                                               |
| Yes                                                                                                                        |     | 53 (35.6) |     | 52 (36.4)                              |   | 1 (16.7)                                      |
| No                                                                                                                         |     | 26 (17.4) |     | 23 (16.1)                              |   | 3 (50)                                        |
| Don't know                                                                                                                 |     | 79 (47.0) |     | 68 (47.6)                              |   | 2 (33.3)                                      |
| How important do you consider vaccinations in general? n (%)                                                               | 145 |           | 140 |                                        | 5 |                                               |
| Not important at all                                                                                                       |     | 6 (4.1)   |     | 5 (3.6)                                |   | 1 (20)                                        |
| Slightly important                                                                                                         |     | 9 (6.2)   |     | 8 (5.7)                                |   | 1 (20)                                        |
| Important                                                                                                                  |     | 36 (24.8) |     | 33 (23.6)                              |   | 3 (60)                                        |
| Fairly important                                                                                                           |     | 39 (26.9) |     | 39 (27.9)                              |   | 0 (-)                                         |
| Very important                                                                                                             |     | 55 (37.9) |     | 55 (39.9)                              |   | 0 (-)                                         |

### eTable 3: Factors Associated With and Reasons for Declined Participation in Parents

**eTable 3a.** Factors associated with parents' willingness to participate in respiratory surveillance procedures of children in daycare centers for SARS-CoV-2 in univariable and in multivariable\* logistic regression analyses. Only one parent per household filled in the questionnaire. OR: odds ratio, CI: confidence interval, 1.00: reference category.

| Variable                                                                                                       | Univariable OR (95%-CI) | p-value | Multivariable OR (95%-CI) | p-value |
|----------------------------------------------------------------------------------------------------------------|-------------------------|---------|---------------------------|---------|
| Proposed study module (defined by type of respiratory sampling)                                                |                         | <0.0001 |                           | <0.0001 |
| 1 (2x nasal swab/week)                                                                                         | 0.14 (0.07-0.29)        |         | 0.11 (0.05-0.27)          |         |
| 2 (1x nasal swab/week)                                                                                         | 0.17 (0.08-0.38)        |         | 0.18 (0.07-0.46)          |         |
| 3 (2x sputum/week)                                                                                             | 1.00                    |         | 1.00                      |         |
| 4 (pharyngeal swab in case of symptoms)                                                                        | 0.45 (0.23-0.86)        |         | 0.36 (0.16-0.77)          |         |
| Age of parent (years)                                                                                          |                         | 0.1175  |                           | 0.6879  |
| <30                                                                                                            | 0.46 (0.21 – 1.01)      |         | 0.64 (0.24-1.68)          |         |
| 30-34                                                                                                          | 0.72 (0.41-1.26)        |         | 0.72 (0.37-1.41)          |         |
| 35-39                                                                                                          | 1.04 (0.60 – 1.79)      |         | 0.90 (0.47-1.73)          |         |
| ≥40                                                                                                            | 1.00                    |         | 1.00                      |         |
| Parent female vs. male                                                                                         | 0.67 (0.41 -1.12)       | 0.1249  | 0.96 (0.52-1.77)          | 0.8978  |
| School education                                                                                               |                         | <0.0001 |                           | 0.0100  |
| None, Secondary Comprehensive, or Other                                                                        | 1.00                    |         | 1.00                      |         |
| Secondary                                                                                                      | 2.10 (0.93 -4.72)       |         | 1.9 (0.72-5.05)           |         |
| Grammar                                                                                                        | 6.19 (2.98-12.86)       |         | 3.46 (1.40 -8.56)         |         |
| SARS-COV-2 considered dangerous for parent/family (not/somewhat/dangerous vs fairly/very dangerous)            | 1.19 (0.77 – 1.83)      | 0.4320  | 1.49 (0.86-2.57)          | 0.1560  |
| SARS-COV-2 considered dangerous for society (not/somewhat/dangerous vs fairly/very dangerous)                  | 0.54 (0.35 – 0.83)      | 0.0051  | 0.75 (0.42-1.37)          | 0.3514  |
| Personal knowledge of SARS-CoV-2 infection/disease/fatality (yes vs no)                                        | 1.62 (1.05 -2.50)       | 0.0283  | 1.01 (0.60-1.70)          | 0.9774  |
| Restrictive measures against SARS-CoV-2 considered important (not/slightly/important vs fairly/very important) | 0.37 (0.22 -0.61)       | 0.0001  | 0.85 (0.43-1.68)          | 0.6371  |
| Extent of limitation felt in personal life by SARS-CoV-2 (not/slightly/limited vs. fairly/very limited)        | 2.48 (1.63 – 3.77)      | <0.0001 | 1.78 (1.08-2.94)          | 0.0237  |
| Willingness to be vaccinated against SARS-CoV-2                                                                |                         | <0.0001 |                           | 0.0001  |
| Yes                                                                                                            | 8.80 (4.61-16.79)       |         | 5.01 (2.25-11.18)         |         |
| Don't know                                                                                                     | 3.05 (1.64-5.68)        |         | 2.19 (1.04-4.60)          |         |
| No                                                                                                             | 1.00                    |         | 1.00                      |         |
| Vaccinations considered important in general (not/slightly/important vs fairly/very important)                 | 0.13 (0.07 -0.25)       | <0.0001 | 0.31 (0.15-0.63)          | 0.0014  |

\*Adjusted for study module, age, parent female vs. male, school education, SARS-COV-2 considered dangerous for parent/family, SARS-COV-2 considered dangerous for society, personal knowledge of SARS-CoV-2 infection/disease/fatality, restrictive measures against SARS-CoV-2 considered important, extent of limitation felt in personal life by SARS-CoV-2, willingness to be vaccinated against SARS-CoV-2, vaccinations considered important in general

**eTable 3b.** Main reasons provided by 171 parents of children in daycare centers for not participating in the respiratory surveillance for SARS-CoV-2

| Reason given for refusing participation in the respiratory surveillance                                    | N (%)       |
|------------------------------------------------------------------------------------------------------------|-------------|
| Considered participation in study/respiratory surveillance a potentially negative experience for the child | 27 (15.8)   |
| Previous negative experience (e.g. child refusal) with respiratory sampling                                | 10 (5.8)    |
| Objected to participate in any studies on / with children                                                  | 9 (5.3)     |
| Personal situation / circumstances                                                                         | 9 (5.3)     |
| No interest in study participation                                                                         | 6 (3.5)     |
| Objected respiratory testing of asymptomatic children / believed testing is unnecessary                    | 5 (2.9)     |
| Stated that child is / was already tested for SARS-CoV-2                                                   | 5 (2.9)     |
| Denial / sceptical attitude towards SARS-CoV-2 pandemic                                                    | 5 (2.9)     |
| Concerns regarding data protection / amount of data collected                                              | 4 (2.3)     |
| Considered study information given as insufficient                                                         | 3 (1.8)     |
| Language barrier                                                                                           | 2 (1.2)     |
| Several reasons given                                                                                      | 7 (4.1)     |
| No explicit reason given                                                                                   | 79 (46.2)   |
| All                                                                                                        | 171 (100.0) |

**eTable 4: Dropout Rates in Modules 1-3 and Unsuccessful Testing in Module 4**

**eTable 4a** Drop-out rates of participants (children and CCW in day care centers) from SARS-CoV-2 surveillance by biweekly (module 1) and weekly (module 2) nasal swabs and by saliva sampling (module 3)

| Drop out n(%) of all surveillance participants (N) | Module 1  |                  | Module 2  |                  | Module 3   |                |
|----------------------------------------------------|-----------|------------------|-----------|------------------|------------|----------------|
|                                                    | N         | n (%)            | N         | n (%)            | N          | n (%)          |
| Children                                           | 44        | 11 (25.0)        | 43        | 10 (23.3)        | 120        | 3 (2.5)        |
| CCW*                                               | 18        | 0 (0.0)          | 12        | 1 (8.3)          | 36         | 3 (8.3)        |
| <b>Overall</b>                                     | <b>62</b> | <b>11 (17.7)</b> | <b>55</b> | <b>11 (20.0)</b> | <b>156</b> | <b>6 (3.9)</b> |

One child and 4 CCW who were initially considered eligible and had given informed consent to respiratory sampling were excluded from drop-out analysis, as they could not participate in respiratory sampling for reasons unrelated to the respiratory surveillance measures.

**eTable 4b.** Rates of unsuccessful testing of participants in SARS-CoV-2 surveillance by respiratory sampling upon symptoms (module 4) over the regular study period of 12 weeks. Successful testing of participants was defined as follows: children and CCW in day care centers and their household members, contacting the study center in case of symptoms, with respiratory sampling result (PCR from oropharyngeal swab) available within 72h after symptom start/call to the study center. Overall, 220 tests from 179 symptomatic participants were scheduled; 9 tests were excluded from analysis due to missing date of test result.

|                                                          | Module 4                            |                |
|----------------------------------------------------------|-------------------------------------|----------------|
|                                                          | n/ N                                | % (95%-CI)*    |
| Total                                                    | 12 / 211                            | 5.7 (3.3-9.7)  |
| Testing of participating children plus household members | 12 <sup>#</sup> / 161 <sup>##</sup> | 7.5 (4.3-12.6) |
| Testing of CCW plus household members                    | 0 / 50 <sup>###</sup>               | 0              |

\*95%-CI after Score Wilson; <sup>#</sup>7 tests of children and 5 of household members of children; <sup>##</sup> 92 tests of children, 69 of household members of children; <sup>###</sup> 35 tests of CCW, 15 of household members of CCW

**eTable 5. Number of Samples Tested for SARS-CoV-2 in DCC With Continuous Surveillance**

**(Modules 1-3)**

| Participants                                                        | Module 1     |                       | Module 2     |                       | Module 3     |                       | Any sample   |                       |
|---------------------------------------------------------------------|--------------|-----------------------|--------------|-----------------------|--------------|-----------------------|--------------|-----------------------|
|                                                                     | No. of tests | No. of positive tests | No. of tests | No. of positive tests | No. of tests | No. of positive tests | No. of tests | No. of positive tests |
| Children (study period)                                             | 712          | 0                     | 343          | 0                     | 2387         | 0                     | 3442         | 0                     |
| Children (lockdown)                                                 | 123          | 0                     | 35           | 0                     | 594          | 1                     | 752          | 1                     |
| <b>Children (total)</b>                                             | <b>835</b>   | <b>0</b>              | <b>378</b>   | <b>0</b>              | <b>2981</b>  | <b>1</b>              | <b>4194</b>  | <b>1</b>              |
| CCW (study period)                                                  | 347          | 0                     | 122          | 0                     | 630          | 0                     | 1099         | 0                     |
| CCW (lockdown)                                                      | 118          | 0                     | 47           | 0                     | 311          | 0                     | 476          | 0                     |
| <b>CCW (total)</b>                                                  | <b>465</b>   | <b>0</b>              | <b>169</b>   | <b>0</b>              | <b>941</b>   | <b>0</b>              | <b>1575</b>  | <b>0</b>              |
| Total No of samples<br>(children + CCW;<br>study period + lockdown) | <b>1300</b>  | <b>0</b>              | <b>547</b>   | <b>0</b>              | <b>3922</b>  | <b>1</b>              | <b>5769</b>  | <b>1</b>              |

DCC: Day care center(s); CCW: child care worker(s);  
No= number



**eTable 6. Model Parameters Used for All Simulations**

| Parameter                                                                               | Parameter                                 | Values                                       |    |
|-----------------------------------------------------------------------------------------|-------------------------------------------|----------------------------------------------|----|
| General model parameters                                                                | Number of simulations                     | 40 000                                       |    |
|                                                                                         | Simulation time $t_{max}$                 | 30 days                                      |    |
|                                                                                         | Time step $\Delta t$                      | 1 day                                        |    |
| DCC parameters                                                                          | Number of groups                          | 4                                            |    |
|                                                                                         | Number of children/group                  | 17 – 26                                      |    |
|                                                                                         | Number of CCW/group                       | 2 – 4                                        |    |
|                                                                                         | Number of heads                           | 2                                            |    |
| Infection related parameters                                                            | Ratio asymptomatic/symptomatic            | 20%                                          |    |
|                                                                                         | Asymptomatic spreading                    | 42% <sup>11</sup>                            |    |
|                                                                                         | Development of immunity after infection   | 100%                                         |    |
|                                                                                         | Loss of immunity after infection          | 0%                                           |    |
| Viral load parameters <sup>9</sup>                                                      | Time between viral peak and symptom onset | $\sim U(1,3)$                                |    |
|                                                                                         | Time point viral peak                     | $\sim N(4.3,0.92)$                           |    |
|                                                                                         | Viral peak children                       | $\sim N(7.44,0.7)$                           |    |
|                                                                                         | Viral peak adults                         | $\sim N(7.94,0.7)$                           |    |
|                                                                                         | Slope viral peak until $<10^6$            | $\sim N(0.17,0.02)$                          |    |
| Days infectious after viral peak                                                        | $\sim U(7,9)$ <sup>12</sup>               |                                              |    |
| Aerosol transmission and infection risk calculator in indoor environments <sup>10</sup> | Room ventilation                          | 0.35 (passive)                               |    |
|                                                                                         | Total mask efficiency                     | 0.0 (no mask)                                |    |
|                                                                                         | Average class room volume                 | 60 m <sup>2</sup> · 3 m = 180 m <sup>3</sup> |    |
|                                                                                         | Shared room volume                        | 60 m <sup>2</sup> · 3 m = 180 m <sup>3</sup> |    |
|                                                                                         | CCW common room volume                    | 20 m <sup>2</sup> · 3 m = 60 m <sup>3</sup>  |    |
|                                                                                         | Head office volume                        | 10 m <sup>2</sup> · 3 m = 30 m <sup>3</sup>  |    |
|                                                                                         | Infectious episode                        | children – children                          | 6h |
|                                                                                         |                                           | children – CCW                               | 6h |
|                                                                                         |                                           | CCW – CCW (intra group)                      | 6h |
| CCW – CCW (inter group)                                                                 |                                           | 1h                                           |    |
| head – CCW (inter group)                                                                |                                           | 0.5h                                         |    |
| PCR Test quality criteria                                                               | Sensitivity                               | 99.99%                                       |    |
|                                                                                         | Limit of detection                        | 10 <sup>3</sup> copies/ml                    |    |
|                                                                                         | Specificity                               | 100%                                         |    |
|                                                                                         | Result availability time                  | 0.5 d                                        |    |

**eTable 7. Varied Parameters and Processes in the Model**

| Parameter                    | Values                                                                                                                                                                                                                                                                                                                                                                                  |                                     |
|------------------------------|-----------------------------------------------------------------------------------------------------------------------------------------------------------------------------------------------------------------------------------------------------------------------------------------------------------------------------------------------------------------------------------------|-------------------------------------|
| Children participation rate  | (0, 0.1, 0.2, ..., 1.0)                                                                                                                                                                                                                                                                                                                                                                 |                                     |
| Test frequency and test days | Test frequency [1/week]                                                                                                                                                                                                                                                                                                                                                                 | Test days                           |
|                              | No Testing                                                                                                                                                                                                                                                                                                                                                                              | NA                                  |
|                              | 1                                                                                                                                                                                                                                                                                                                                                                                       | Mo, We, Fr                          |
|                              | 2                                                                                                                                                                                                                                                                                                                                                                                       | Mo – We, Mo – Th, Tu – Th, Wed – Fr |
|                              | 3                                                                                                                                                                                                                                                                                                                                                                                       | Mo – Tu – Fr                        |
|                              | 5                                                                                                                                                                                                                                                                                                                                                                                       | Mo – Tu – We – Th – Fr              |
| Starting condition           | <ol style="list-style-type: none"> <li>1. One infected child that is asymptomatic and does not participate in regular testing</li> <li>2. One infected child that is randomly symptomatic or asymptomatic and randomly does participate in regular testing</li> <li>3. One infected CCW that is randomly symptomatic or asymptomatic and is participating in regular testing</li> </ol> |                                     |
| Quarantine policy            | <ol style="list-style-type: none"> <li>1. Positive tested individual is isolated; all group members of the corresponding children and CCW are quarantined</li> <li>2. Positive tested individual is isolated; the group stays in the DCC</li> </ol>                                                                                                                                     |                                     |

**eFigure 1. Flowcharts of Wue-KiTā-CoV Study**

**eFigure 1a**

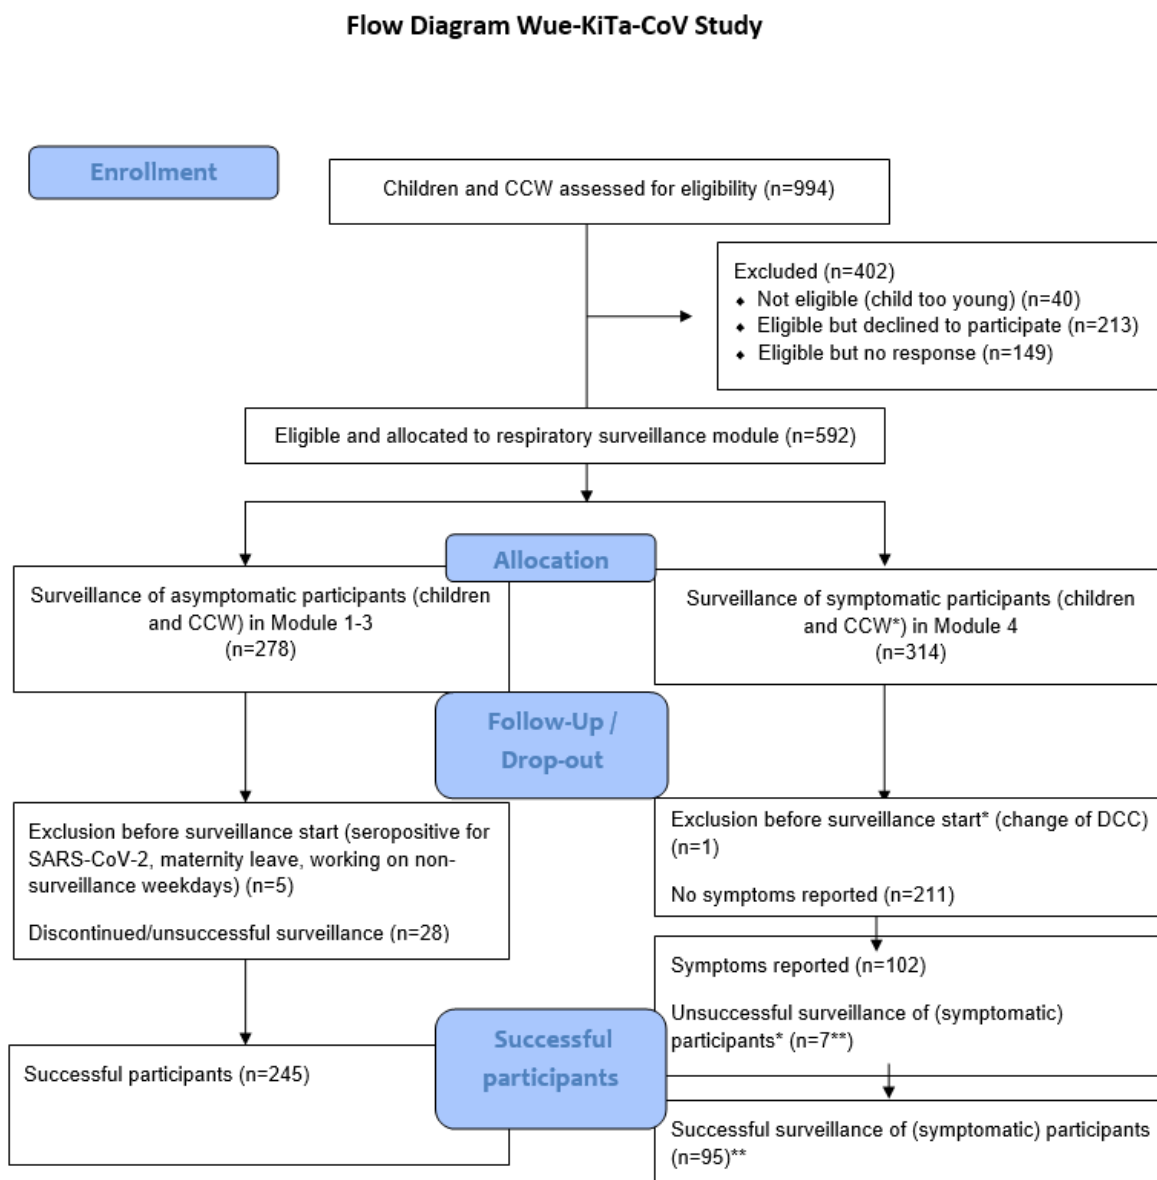

**eFigure 1a. Flow chart Wue-KiTā-CoV study – Overview participating children and CCW in modules 1-3 and module 4.** All data in the Flow chart refer to the regular 12-weeks surveillance period. \*Regarding surveillance of symptomatic participants in Module 4, the Flow chart refers only to recruited children and CCW, not to the symptomatic household members of children/CCW. There were additional 77 symptomatic household members and for 5 household members surveillance was not successful. For details on Module 4 participants, see eFigure 1b.

**eFigure 1b**

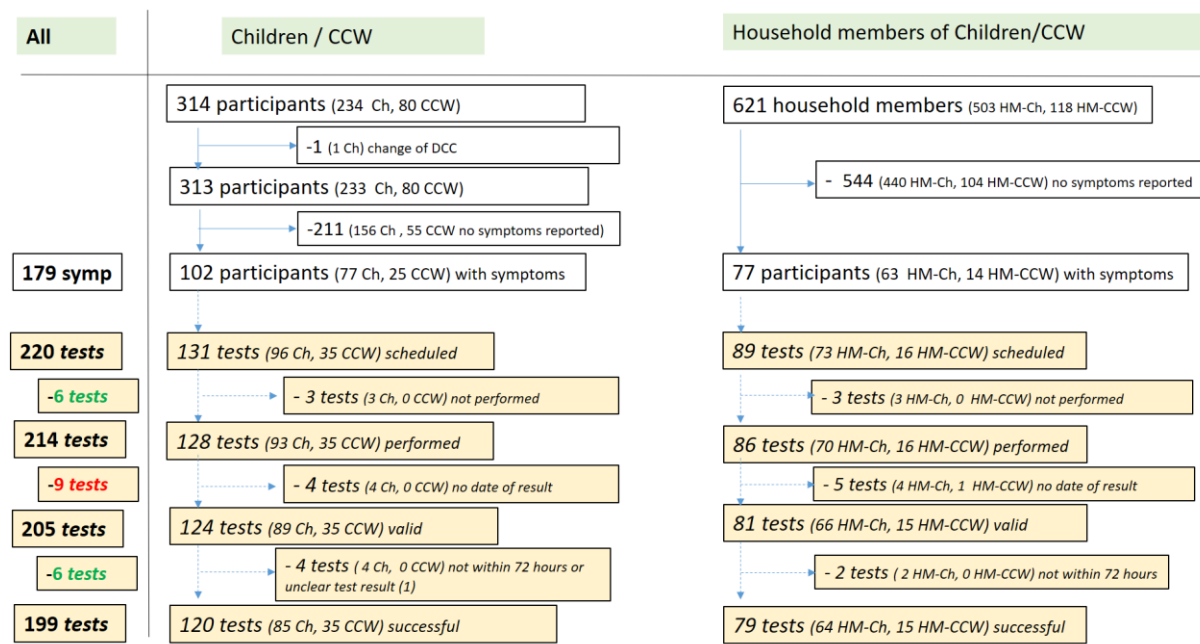

**eFigure 1b. Flow chart Wue-KiT-Ta-CoV Study for Module 4 – participants and testings in children, CCW and their household members.** All data refer to the regular 12 weeks study observation period. Regarding household members, detailed information on household size were missing from 4 households of children/parents (counted as 1 household member each) and 5 CCW (counted as 0 household members). From 220 tests performed on 179 symptomatic participants, the 9 tests with no date of test result were excluded as ‘missing’ from primary endpoint analysis. The 6 tests ‘not performed’ and the 6 tests with the result or not available within 72hours or unclear result were counted as “unsuccessful” regarding primary endpoint analysis. Ch = child/children, CCW=childcare worker, HM-Ch: household member of recruited child, HM-CCW: household member of recruited CCW.

**eFigure 2: General and Specific Measures Implemented Against SARS-CoV-2**

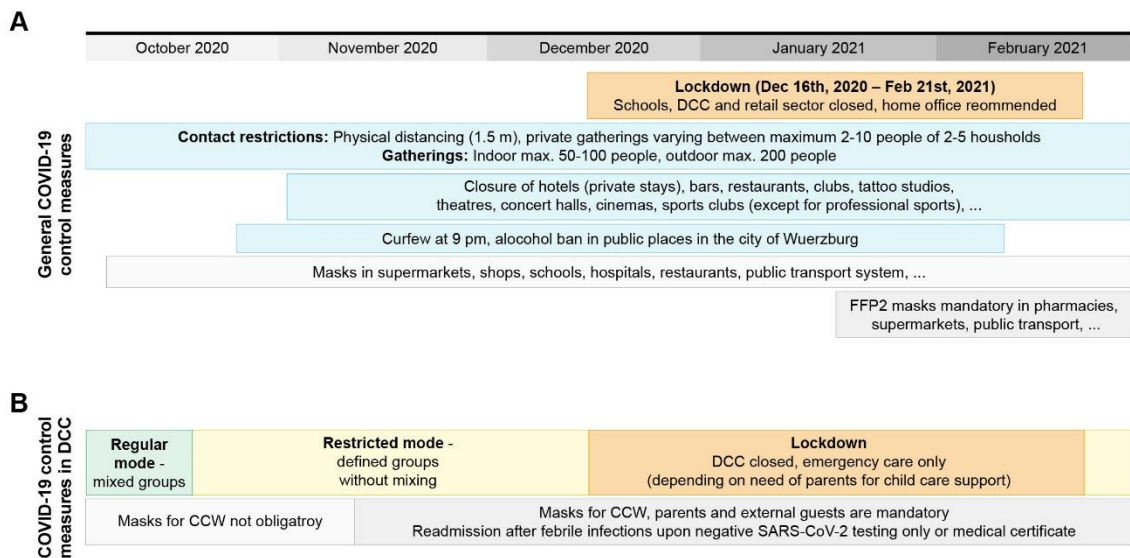

**eFigure 2: A)** General measures implemented against SARS-CoV-2 spread by the federal and local government; **B)** Specific measures for DCC in Wuerzburg

### eFigure 3. Final Assessment of Study Measures by Parents and CCWs

**Supplement eFigure 3A.** Final assessment of parents from daycare centers regarding the study measures judged at the end of the respiratory surveillance ("week12") for SARS-CoV-2, overall and stratified by module 1-3 vs module 4 (WueKITaCoV Study, Germany, 2020-2021)

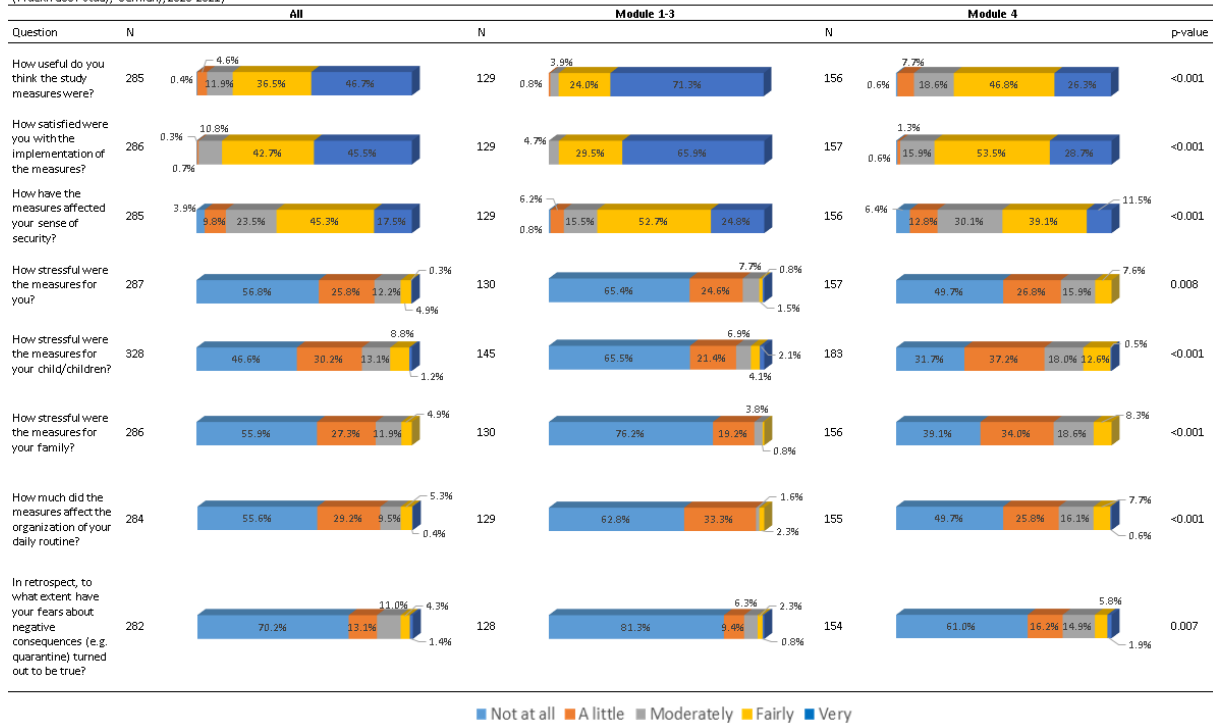

**Supplemental Figure eFig 3 B.** Final assessment of CCW from daycare centers regarding the study measures judged at the end of the respiratory surveillance ("week12") for SARS-CoV-2, overall and stratified by module 1-3 vs module 4 (WueKITaCoV Study, Germany, 2020-2021)

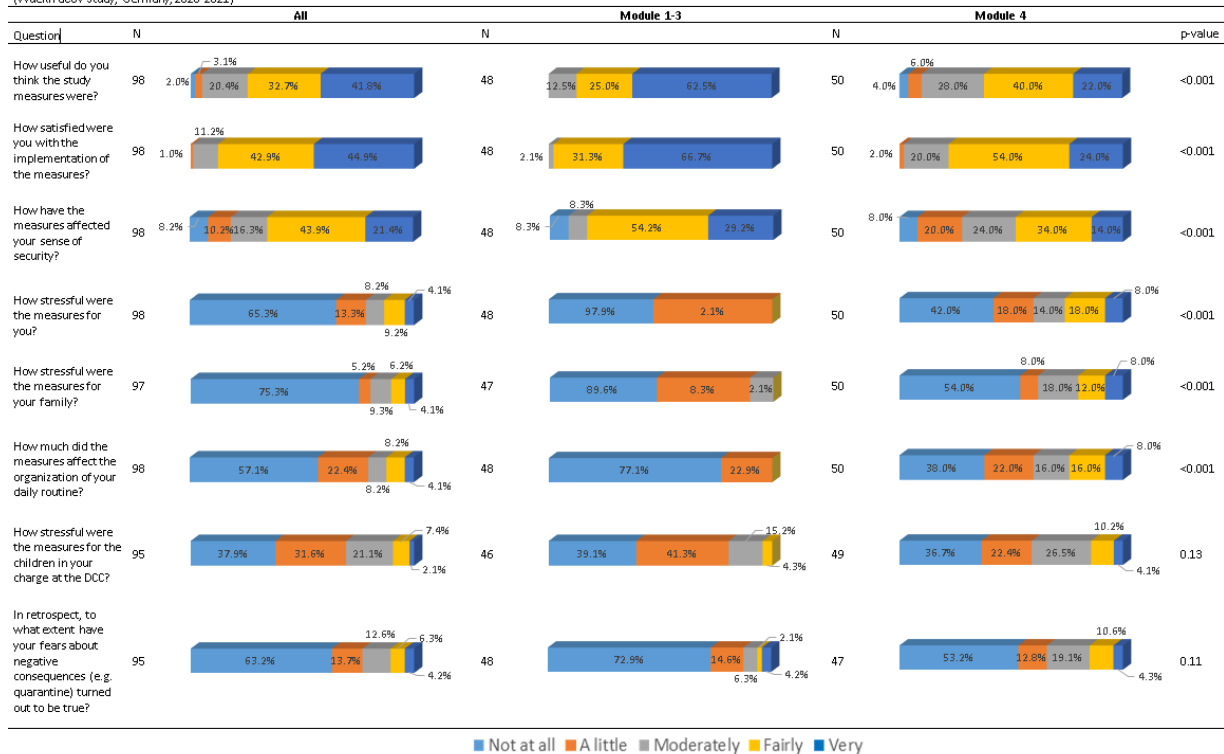

**eFigure 3 – Final assessment of study measures by (A) parents and (B) CCW, judged at the end of the respiratory surveillance period, overall and stratified by module 1-3 vs module 4.**

**eFigure 4. Events Associated With Potential Introduction of SARS-CoV-2 Into a DCC.**

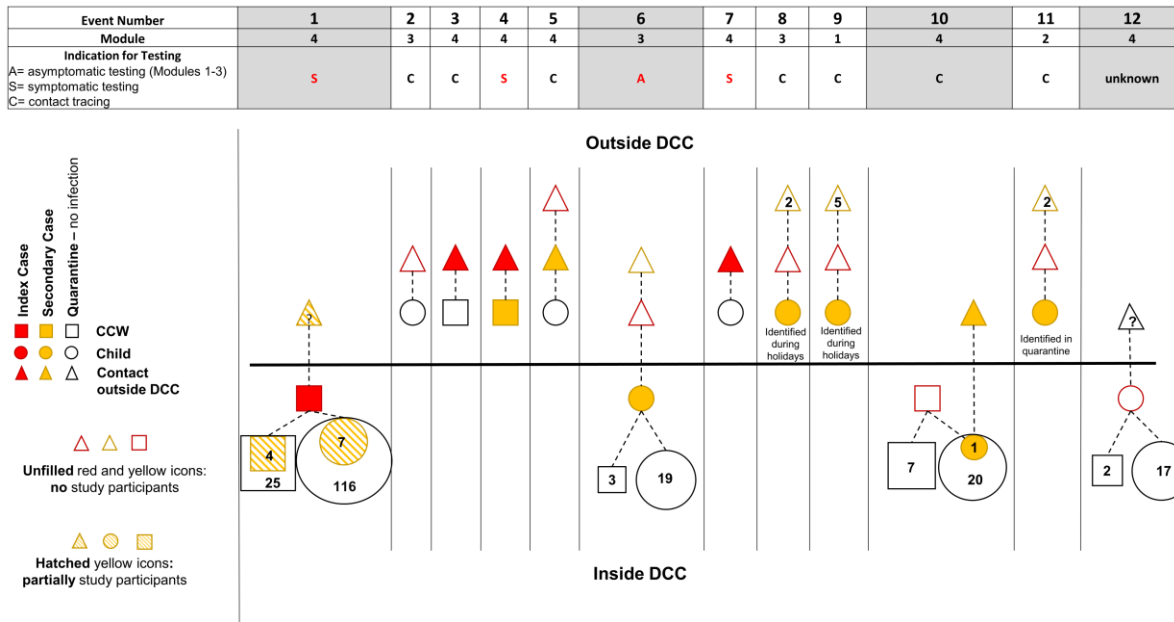

**eFigure 4** – Events associated with potential introduction of SARS-CoV-2 into a DCC. Module indicates the participant’s designated module per study protocol. Asymptomatic (A), symptomatic (S) and contact tracing (C) characterizes the individual indication for testing, regardless of the designated module.

### eFigure 5. Modeling Results Scenario 1

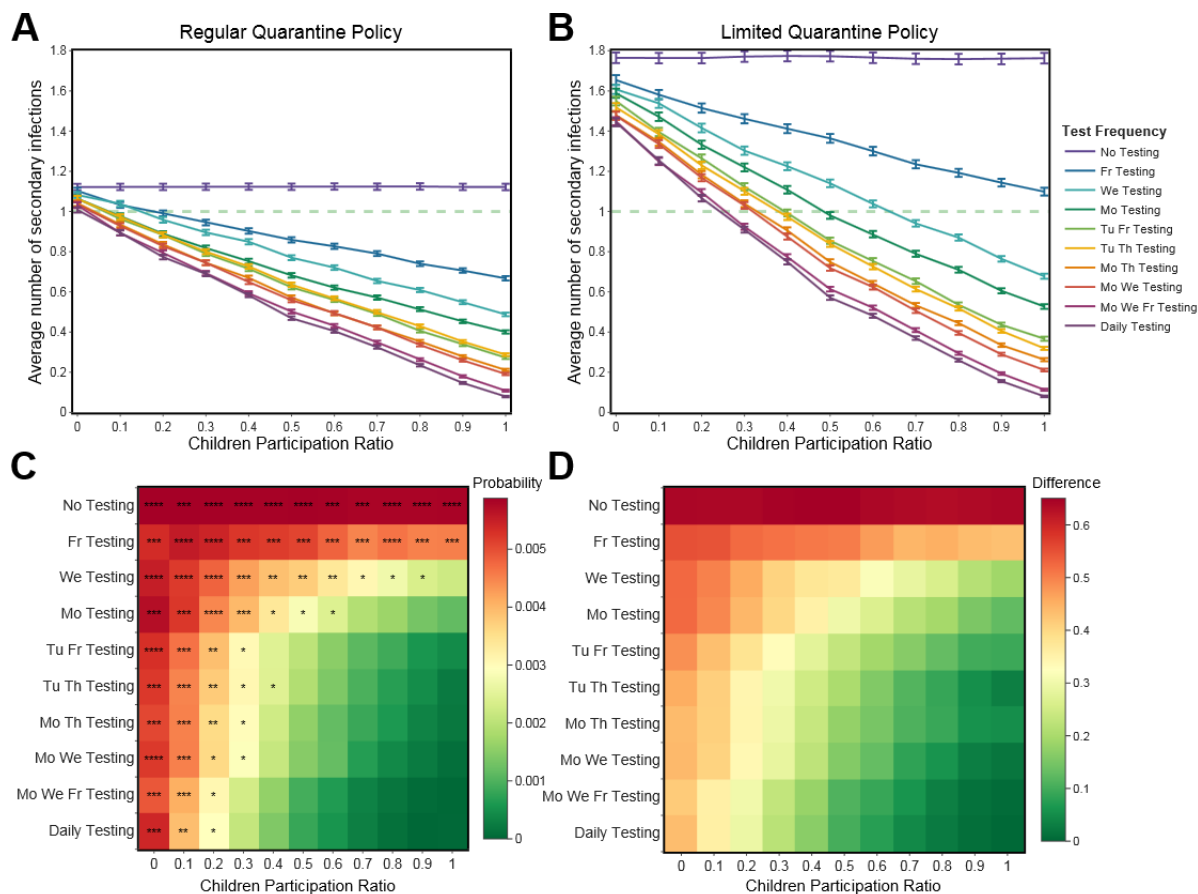

**eFigure 5 –** Simulation results of the virtual infection spread model for scenario 1. Waiting time until the test result is available is 0.5 days. Average number of secondary infections is shown for various children participation rates and test frequencies for regular **(A)** and limited **(B)** quarantine policies. Error bars indicate the standard deviation of the estimation of the ASI. **(C)** Comparison of the quarantine policies, where colours represent the probability to get more secondary infections and stars indicate, whether results for different quarantine policies are significantly different with significance levels (\*\*\*\*  $p < 0.001$ , \*\*\*  $p < 0.005$ , \*\*  $p < 0.01$ , \*  $p < 0.05$ ). **(D)** Difference between mean values of all scenarios for the different quarantine policies. For the test participation of children of 50% and “Mo testing”, “Mo-We testing” and “Mo-We-Fr testing” the ASI will reduce by 44.7 %, 59.48% and 65.38% compared to “No testing” for the limited quarantine policy, respectively.



**eFigure 6. Modeling results scenario 2**

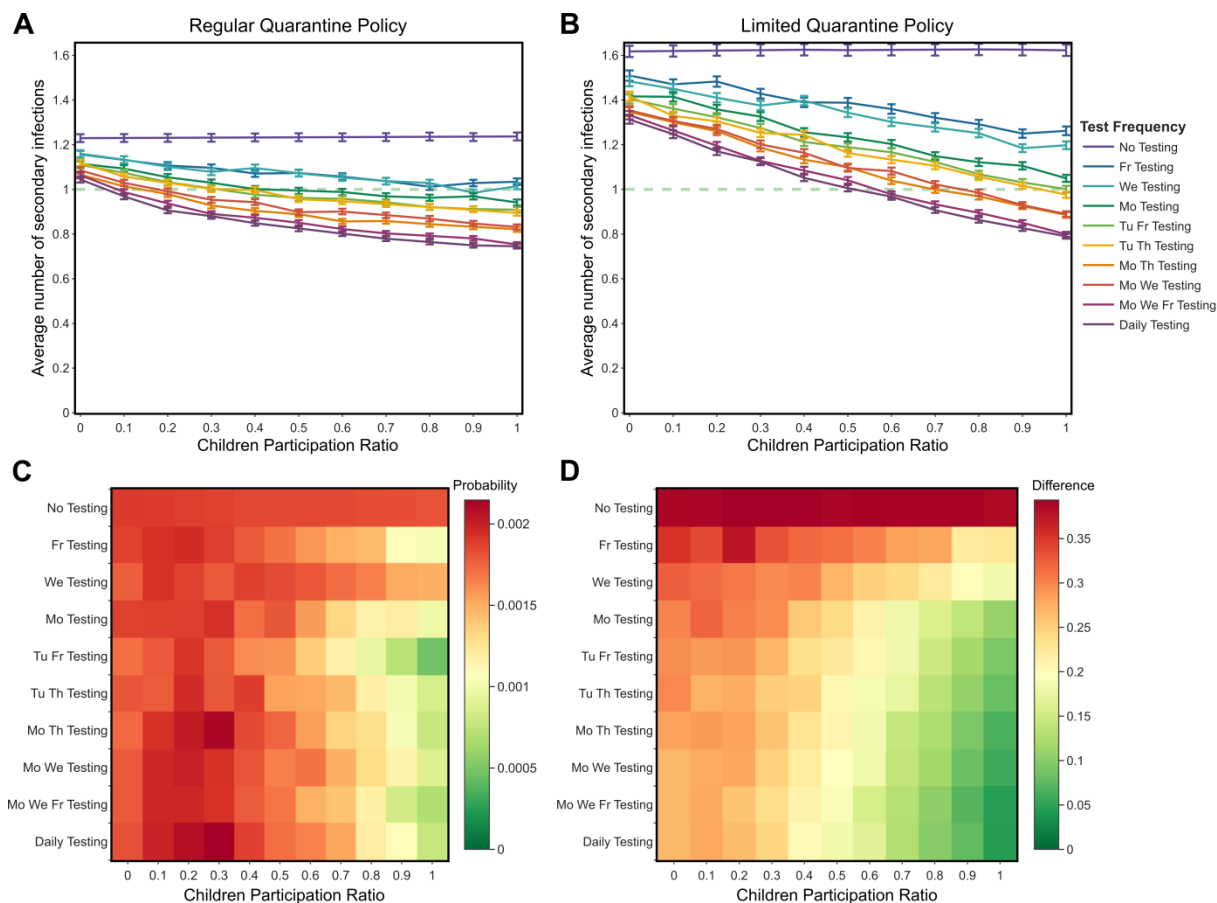

**eFigure 6. Simulation Results of the Virtual Infection Spread Model for Scenario 2.**

Waiting time until the test result is available is 0.5 days. Average number of secondary infections is shown for various children participation rates and test frequencies for regular **(A)** and limited **(B)** quarantine policies. Error bars indicate the standard deviation of the estimation of the ASI. **(C)** Comparison of the quarantine policies, where colours represent the probability to get more secondary infections and stars indicate, whether results for different quarantine policies are significantly different with significance levels (\*\*\*\*  $p < 0.001$ , \*\*\*  $p < 0.005$ , \*\*  $p < 0.01$ , \*  $p < 0.05$ ). **(D)** Difference between mean values of all scenarios for the different quarantine policies. For all test frequencies  $>0$  and all participation rates  $>0$  the ASI is higher than for scenario 1 as infection can only be detected if at least one secondary infection occurs that either shows symptoms or participates in testing. For the test participation of children of 50% and “Mo testing”, “Mo-We testing” and “Mo-We-Fr testing” the ASI will reduce by 19.48%, 27.19% and 31.05% compared to “No testing” for the regular quarantine policy, respectively. Similarly, for the limited quarantine policy the ASI will reduce by 24.03%, 32.51% and 35.9% respectively.

**eFigure 7. Modeling Results Scenario 3**

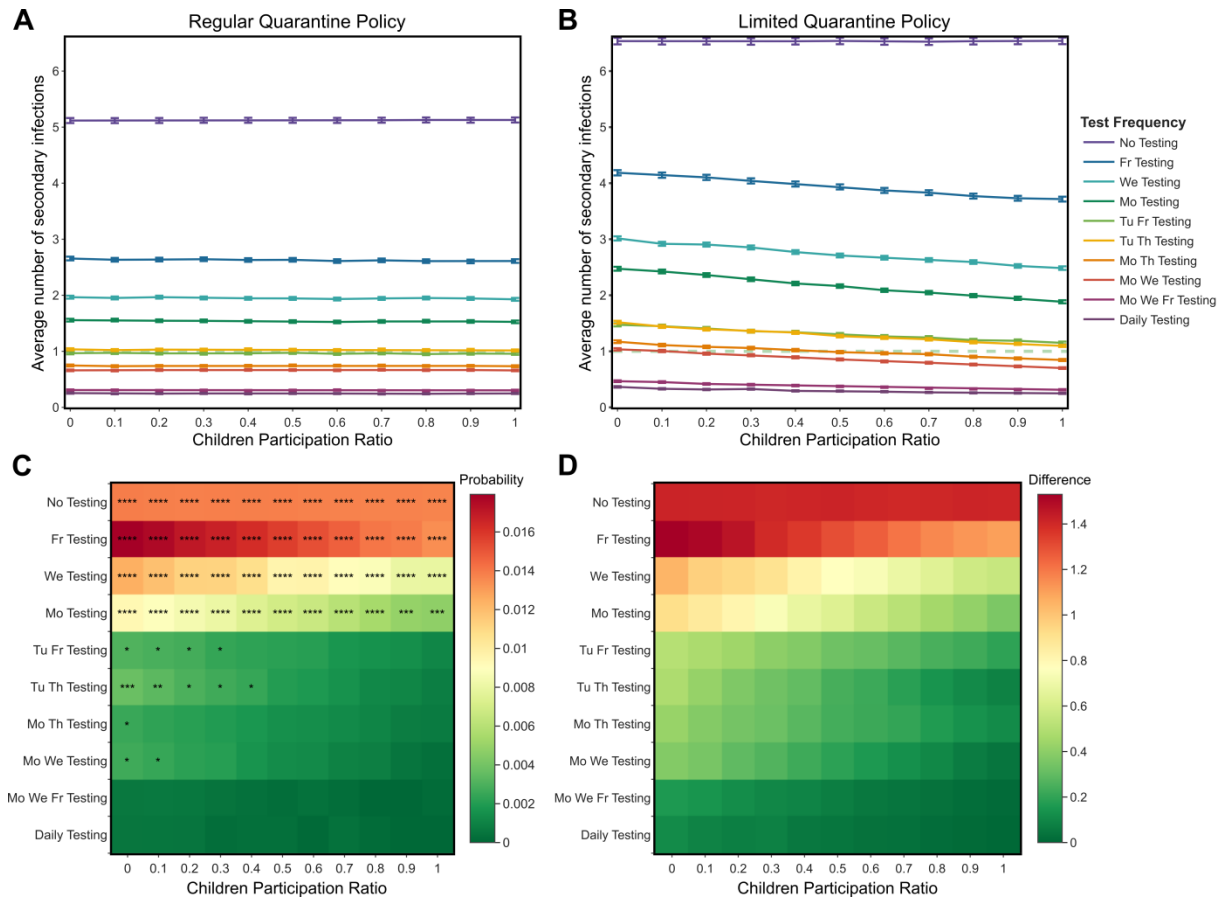

**eFigure 7** – Simulation results of the virtual infection spread model for the scenario 3. Waiting time until the test result is available is 0.5 days. Average number of secondary infections is shown for various children participation rates and test frequencies for regular **(A)** and limited **(B)** quarantine policies. Error bars indicate the standard deviation of the estimation of the ASI. **(C)** Comparison of the quarantine policies, where colours represent the probability to get more secondary infections and stars indicate, whether results for different quarantine policies are significantly different with significance levels (\*\*\*\*  $p < 0.001$ , \*\*\*  $p < 0.005$ , \*\*  $p < 0.01$ , \*  $p < 0.05$ ). **(D)** Difference between mean values of all scenarios for the different quarantine policies. For the test participation of children of 50% and “Mo testing”, “Mo-We testing” and “Mo-We-Fr testing” the ASI will reduce by 66.9%, 86.9% and 94.3% compared to “No testing” for the limited quarantine policy, respectively.

**eFigure 8. Modeling: Effects of Longer Time to Result on Scenario 1**

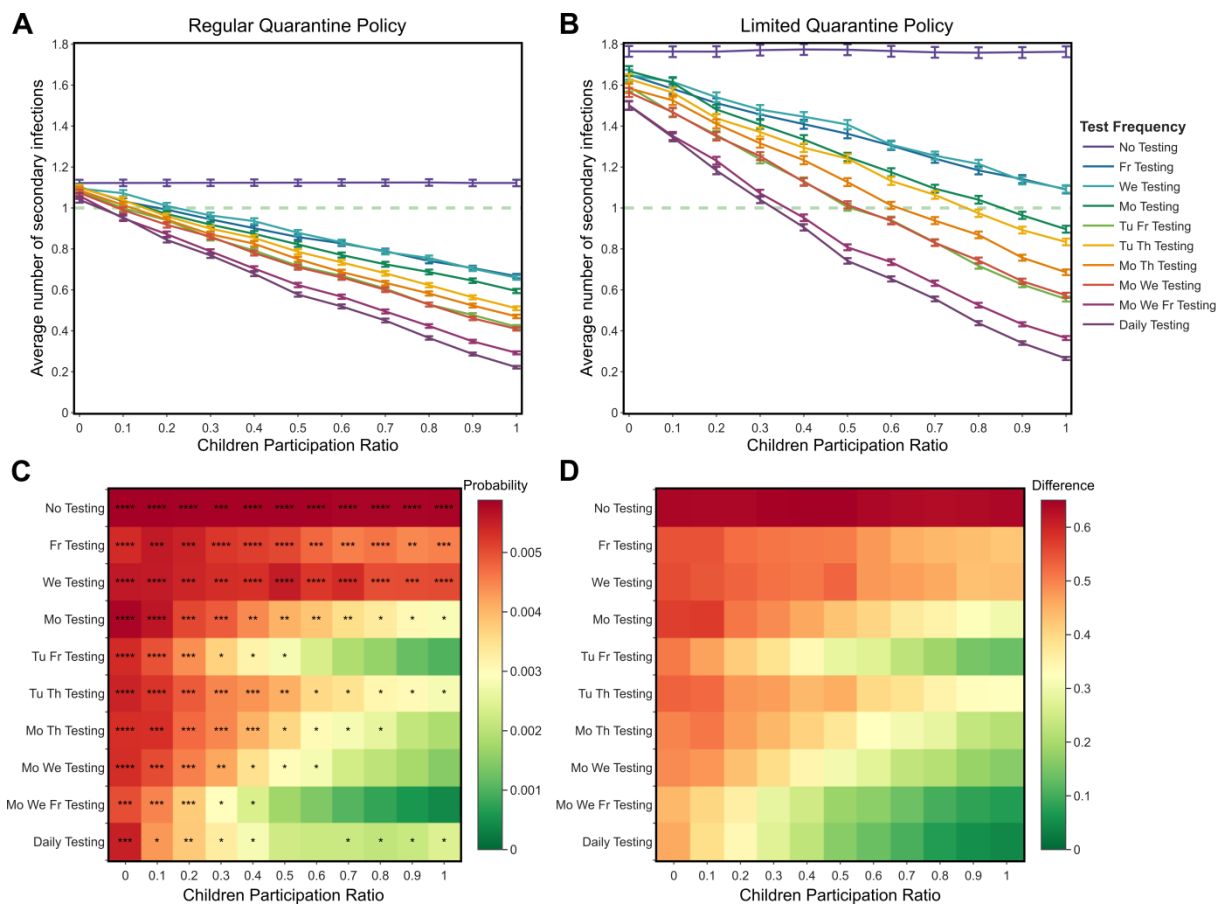

**eFigure 8** – Simulation results of the virtual infection spread model for the scenario 1. Waiting time until the test result is available is 1.5 days. Average number of secondary infections is shown for various children participation rates and test frequencies for regular **(A)** and limited **(B)** quarantine policies. Error bars indicate the standard deviation of the estimation of the ASI. **(C)** Comparison of the quarantine policies, where colours represent the probability to get more secondary infections and stars indicate, whether results for different quarantine policies are significantly different with significance levels (\*\*\*\*  $p < 0.001$ , \*\*\*  $p < 0.005$ , \*\*  $p < 0.01$ , \*  $p < 0.05$ ). **(D)** Difference between mean values of all scenarios for the different quarantine policies.

**eFigure 9. Modeling: Effects of Longer Time to Result on Scenario 2**

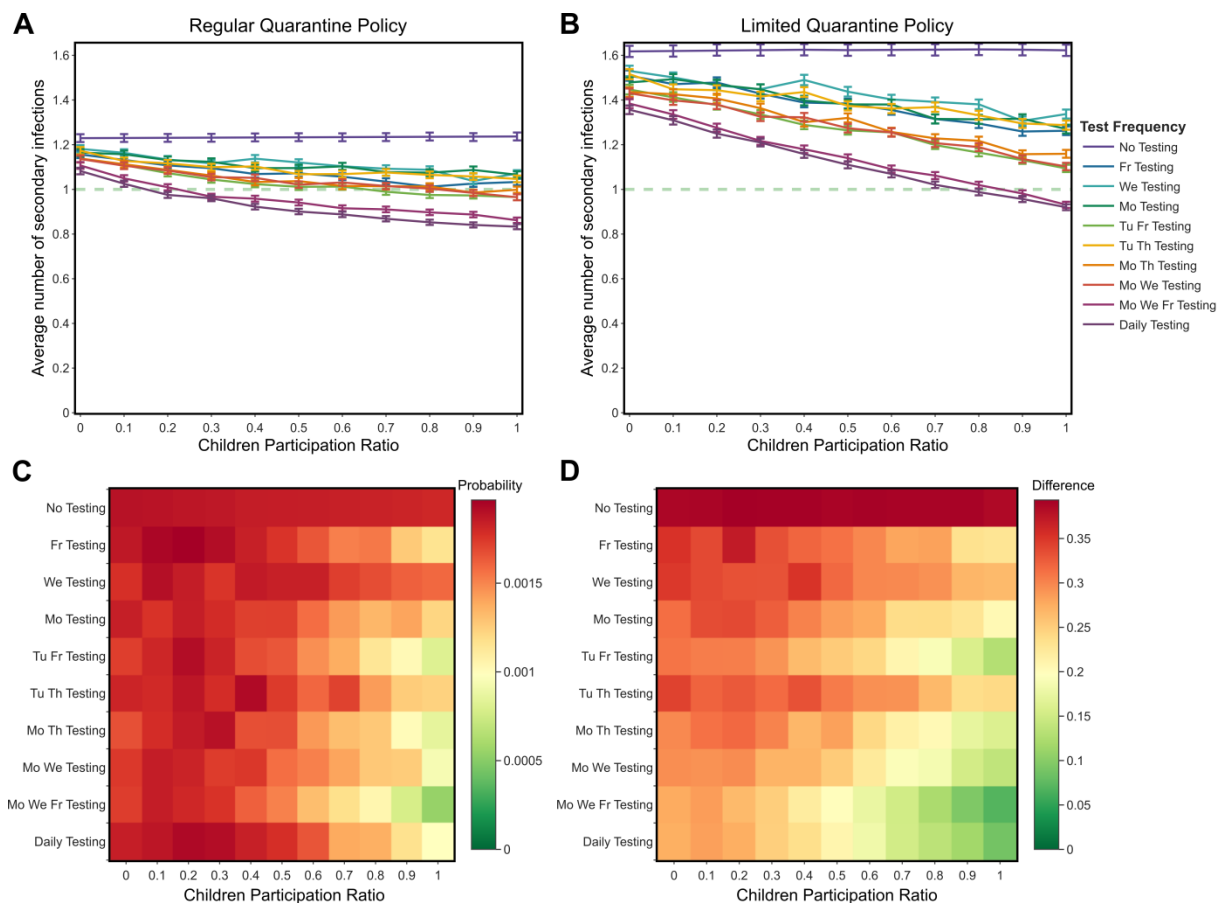

**eFigure 9** – Simulation results of the virtual infection spread model for the scenario 2. Waiting time until the test result is available is 1.5 days. Average number of secondary infections is shown for various children participation rates and test frequencies for regular **(A)** and limited **(B)** quarantine policies. Error bars indicate the standard deviation of the estimation of the ASI. **(C)** Comparison of the quarantine policies, where colours represent the probability to get more secondary infections and stars indicate, whether results for different quarantine policies are significantly different with significance levels (\*\*\*\*  $p < 0.001$ , \*\*\*  $p < 0.005$ , \*\*  $p < 0.01$ , \*  $p < 0.05$ ). **(D)** Difference between mean values of all scenarios for the different quarantine policies.

**eFigure 10. Modeling: Effects of Longer Time to Result on Scenario 3**

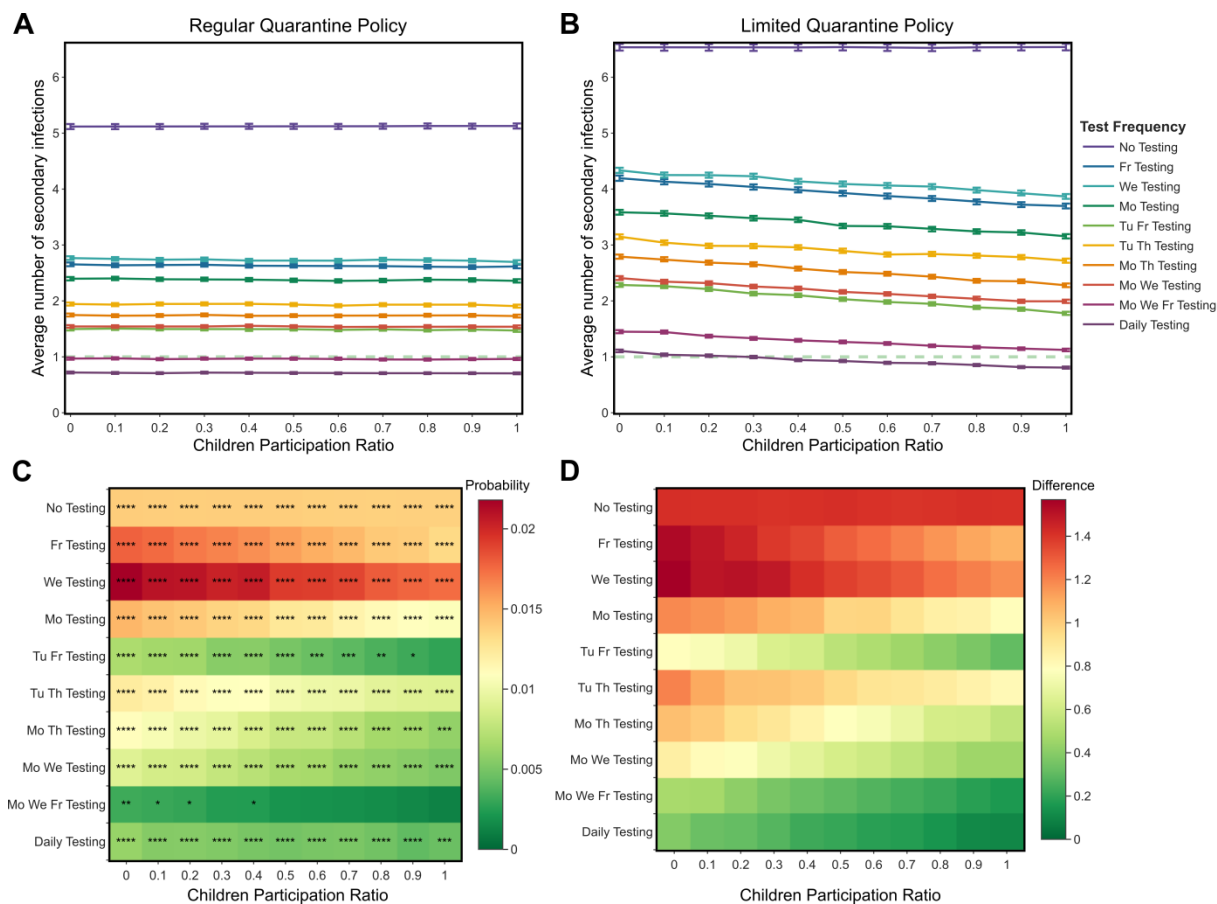

**eFigure 10.** Simulation results of the virtual infection spread model for the scenario 3. Waiting time until the test result is available is 1.5 days. Average number of secondary infections is shown for various children participation rates and test frequencies for regular **(A)** and limited **(B)** quarantine policies. Error bars indicate the standard deviation of the estimation of the ASI. **(C)** Comparison of the quarantine policies, where colours represent the probability to get more secondary infections and stars indicate, whether results for different quarantine policies are significantly different with significance levels (\*\*\*\*  $p < 0.001$ , \*\*\*  $p < 0.005$ , \*\*  $p < 0.01$ , \*  $p < 0.05$ ). **(D)** Difference between mean values of all scenarios for the different quarantine policies.

## eReferences

1. Statistisches Bundesamt. Familien und Familienmitglieder nach Bundesländern. 2020; <https://www.destatis.de/DE/Themen/Gesellschaft-Umwelt/Bevoelkerung/Haushalte-Familien/Tabellen/2-3-familien-bundeslaender.html> Accessed 7/01/2020.
2. Krone M, Gütling J, Wagener J, et al. Performance of three SARS-CoV-2 immunoassays, three rapid lateral flow tests and a novel bead-based affinity surrogate test for the detection of SARS-CoV-2 antibodies in human serum. *Journal of clinical microbiology*. 2021;JCM.00319-00321.
3. Bethell CD, Read D, Stein RE, Blumberg SJ, Wells N, Newacheck PW. Identifying children with special health care needs: development and evaluation of a short screening instrument. *Ambulatory pediatrics : the official journal of the Ambulatory Pediatric Association*. 2002;2(1):38-48.
4. Cox B, Van Oyen H, Cambois E, et al. The reliability of the minimum European health module. *International journal of public health*. 2009;54(2):55-60.
5. Achenbach TM. *The Achenbach system of empirically based assessment (ASEBA): Development, findings, theory, and applications*. University of Vermont, Research Center for Children, Youth, & Families; 2009.
6. Kroenke K, Spitzer RL, Williams JB, Löwe B. An ultra-brief screening scale for anxiety and depression: the PHQ-4. *Psychosomatics*. 2009;50(6):613-621.
7. Löwe B, Wahl I, Rose M, et al. A 4-item measure of depression and anxiety: validation and standardization of the Patient Health Questionnaire-4 (PHQ-4) in the general population. *Journal of affective disorders*. 2010;122(1-2):86-95.
8. Köpke K, Prahm K, Buda S, Haas W. Evaluation einer ICD-10-basierten elektronischen Surveillance akuter respiratorischer Erkrankungen (SEEDARE) in Deutschland. *Bundesgesundheitsblatt - Gesundheitsforschung - Gesundheitsschutz*. 2016;59(11):1484-1491.
9. Jones TC, Biele G, Mühlemann B, et al. Estimating infectiousness throughout SARS-CoV-2 infection course. *Science*. 2021:eabi5273.
10. Lelieveld J, Helleis F, Borrmann S, et al. Model Calculations of Aerosol Transmission and Infection Risk of COVID-19 in Indoor Environments. *International journal of environmental research and public health*. 2020;17(21).
11. Byambasuren O, Cardona M, Bell K, Clark J, McLaws M-L, Glasziou P. Estimating the extent of asymptomatic COVID-19 and its potential for community transmission: systematic review and meta-analysis. *medRxiv* Published 09/13/2020. Accessed 06/06/2021.; <https://www.medrxiv.org/content/medrxiv/early/2020/09/13/2020.05.10.20097543.full.pdf>.
12. Larremore DB, Wilder B, Lester E, et al. Test sensitivity is secondary to frequency and turnaround time for COVID-19 screening. *Science Advances*. 2021;7(1):eabd5393.
