# Supplementary material for: Feasibility of SARS-CoV-2 Surveillance Testing Among Children and Childcare Workers at German Day Care Centers: A Nonrandomized Controlled Trial
Source: PubMed Central journal article supplement (PMC8728621; doi:10.1001/jamanetworkopen.2021.42057), 2022-01-04
Supplement: jamanetwopen-e2142057-s003.pdf [file jamanetwopen-e2142057-s003.pdf]

\*Indicates required information. Only first name, last name, and suffix will appear in PubMed.

| <b>*Group Name(s): The Wü-KiTa-CoV Study Group</b> |                   |                              |                  |                                                                 |                                          |                                                         |                                                                                            |
|----------------------------------------------------|-------------------|------------------------------|------------------|-----------------------------------------------------------------|------------------------------------------|---------------------------------------------------------|--------------------------------------------------------------------------------------------|
| <b>*First Name and Middle Initial(s)</b>           | <b>*Last Name</b> | <b>*Suffix (eg, Jr, III)</b> | Academic Degrees | Institution                                                     | Location (city, state/province, country) | Role or Contribution, eg, chair, principal investigator | Group (if more than 1 Group listed in the byline and/or Subgroup (eg, Steering Committee)) |
| Anastasia                                          | Besenfelder       |                              |                  | Institute for Hygiene and Microbiology, University of Wuerzburg | Würzburg, Germany                        | Technical support                                       |                                                                                            |
| Lena                                               | Buechner          |                              |                  | Institute for Hygiene and Microbiology, University of Wuerzburg | Würzburg, Germany                        | Technical support                                       |                                                                                            |
| Kathrin                                            | Frei              |                              |                  | Institute for Hygiene and Microbiology, University of Wuerzburg | Würzburg, Germany                        | Technical support                                       |                                                                                            |
| Theresa                                            | Höferth           |                              |                  | Institute for Hygiene and Microbiology, University of Wuerzburg | Würzburg, Germany                        | Technical support                                       |                                                                                            |
| Thiên-Trí                                          | Lam               |                              | MD               | Institute for Hygiene and Microbiology, University of Wuerzburg | Würzburg, Germany                        | Advice on coordination                                  |                                                                                            |
| Sabrina                                            | Mündlein          |                              |                  | Institute for Hygiene and Microbiology, University of Wuerzburg | Würzburg, Germany                        | Technical support                                       |                                                                                            |
| Christoph                                          | Schoen            |                              | MD, PhD, MSc     | Institute for Hygiene and Microbiology, University of Wuerzburg | Würzburg, Germany                        | Advice on coordination                                  |                                                                                            |
| Alexandra                                          | Schubert-Unkmeir  |                              | MD               | Institute for Hygiene and Microbiology, University of Wuerzburg | Würzburg, Germany                        | Advice on coordination                                  |                                                                                            |
| Lars                                               | Wallstabe         |                              | PhD              | Institute for Hygiene and Microbiology, University of Wuerzburg | Würzburg, Germany                        | communication with study participants                   |                                                                                            |
| Kerstin                                            | Knies             |                              | PhD              | Institute for Virology, University of Wuerzburg                 | Würzburg, Germany                        | Technical support                                       |                                                                                            |

## Supplemental Online Content: Nonauthor Collaborators

\*Indicates required information. Only first name, last name, and suffix will appear in PubMed.

| *First Name and Middle Initial(s) | *Last Name      | *Suffix (eg, Jr, III) | Academic Degrees | Institution                                             | Location (city, state/province, country) | Role or Contribution, eg, chair, principal investigator | Group (if more than 1 Group listed in the byline) and/or Subgroup (eg, Steering Committee) |
|-----------------------------------|-----------------|-----------------------|------------------|---------------------------------------------------------|------------------------------------------|---------------------------------------------------------|--------------------------------------------------------------------------------------------|
| Rebecca                           | Richter         |                       |                  | Institute for Virology, University of Wuerzburg         | Würzburg, Germany                        | Technical support                                       |                                                                                            |
| Abdullah                          | Almamy          |                       | MD               | Department of Pediatrics, University Hospital Wuerzburg | Würzburg, Germany                        | Field activities                                        |                                                                                            |
| Maxi                              | Bettkober       |                       | MD               | Department of Pediatrics, University Hospital Wuerzburg | Würzburg, Germany                        | Field activities                                        |                                                                                            |
| Viktoria                          | Engert          |                       | MD               | Department of Pediatrics, University Hospital Wuerzburg | Würzburg, Germany                        | Field activities                                        |                                                                                            |
| Phillipp                          | Fecher          |                       | MD               | Department of Pediatrics, University Hospital Wuerzburg | Würzburg, Germany                        | Field activities                                        |                                                                                            |
| Jonas                             | Fischer         |                       | MD               | Department of Pediatrics, University Hospital Wuerzburg | Würzburg, Germany                        | Field activities                                        |                                                                                            |
| Robin                             | Khan            |                       | MD               | Department of Pediatrics, University Hospital Wuerzburg | Würzburg, Germany                        | Field activities                                        |                                                                                            |
| Fabian                            | Kleindiek       |                       | MD               | Department of Pediatrics, University Hospital Wuerzburg | Würzburg, Germany                        | Field activities                                        |                                                                                            |
| Mirja                             | Müller          |                       | MD               | Department of Pediatrics, University Hospital Wuerzburg | Würzburg, Germany                        | Field activities                                        |                                                                                            |
| Lara                              | Müller-Scholden |                       | MD               | Department of Pediatrics, University Hospital Wuerzburg | Würzburg, Germany                        | Field activities                                        |                                                                                            |
| Pauline                           | Nehm            |                       |                  | Department of Pediatrics, University Hospital Wuerzburg | Würzburg, Germany                        | Field activities                                        |                                                                                            |
| Jacobe                            | Rapp            |                       | MD               | Department of Pediatrics, University Hospital Wuerzburg | Würzburg, Germany                        | Field activities                                        |                                                                                            |
| Christina                         | Pfann           |                       | MD               | Department of Pediatrics, University Hospital Wuerzburg | Würzburg, Germany                        | Field activities                                        |                                                                                            |
| Maria                             | Riedmeier       |                       | MD               | Department of Pediatrics, University Hospital Wuerzburg | Würzburg, Germany                        | Field activities                                        |                                                                                            |
| George                            | Robinson        |                       | MD               | Department of Pediatrics, University Hospital Wuerzburg | Würzburg, Germany                        | Field activities                                        |                                                                                            |

## Supplemental Online Content: Nonauthor Collaborators

\*Indicates required information. Only first name, last name, and suffix will appear in PubMed.

| *First Name and Middle Initial(s) | *Last Name | *Suffix (eg, Jr, III) | Academic Degrees | Institution                                             | Location (city, state/province, country) | Role or Contribution, eg, chair, principal investigator | Group (if more than 1 Group listed in the byline) and/or Subgroup (eg, Steering Committee) |
|-----------------------------------|------------|-----------------------|------------------|---------------------------------------------------------|------------------------------------------|---------------------------------------------------------|--------------------------------------------------------------------------------------------|
| Sarah                             | Schnee     |                       | MD               | Department of Pediatrics, University Hospital Wuerzburg | Würzburg, Germany                        | Field activities                                        |                                                                                            |
| Anna-Lena                         | Sieg       |                       | MD               | Department of Pediatrics, University Hospital Wuerzburg | Würzburg, Germany                        | Field activities                                        |                                                                                            |
| Max                               | Siegl      |                       |                  | Department of Pediatrics, University Hospital Wuerzburg | Würzburg, Germany                        | Field activities                                        |                                                                                            |
| Fumi                              | Sugihara   |                       | MD               | Department of Pediatrics, University Hospital Wuerzburg | Würzburg, Germany                        | Field activities                                        |                                                                                            |
| Anne                              | Thieme     |                       | MD               | Department of Pediatrics, University Hospital Wuerzburg | Würzburg, Germany                        | Field activities                                        |                                                                                            |
| Gvantsa                           | Uturgaidze |                       | MD               | Department of Pediatrics, University Hospital Wuerzburg | Würzburg, Germany                        | Field activities                                        |                                                                                            |
| Brigitte                          | Wehner     |                       |                  | Department of Pediatrics, University Hospital Wuerzburg | Würzburg, Germany                        | Field activities                                        |                                                                                            |
